# Supplementary material for: Overcoming the conversion-selectivity trade-off in plasma catalytic conversion of methane to ethylene
Source: Research Square preprint supplement (doi:10.21203/rs.3.rs-8230494/v1), 2025-12-08
Supplement: Supplementary file 1 [file 725a3be5d5daaac3d1ffbedf.docx]

**Supporting Information**

**Overcoming the conversion-selectivity trade-off in plasma catalytic conversion of methane to ethylene**

Zitong Zhanga#, Youran Wangb#, Liujia Zhanga, Zhendong Liub*, Weiming Wana*

a College of Chemistry and Chemical Engineering, Lanzhou University, Lanzhou 730000, China

b State Key Laboratory of Chemical Engineering and Low-carbon Technology, Department of Chemical Engineering, Tsinghua University, Haidian District, Beijing 100084, China

# The author contributes equally

**Supplementary Methods**

**Materials****.** Tetraethyl orthosilicate (TEOS, 98 wt.%) was obtained from Sinopharm Chemical Reagent Co., Ltd. Tetrabutylphosphonium hydroxide (TBPOH, 40 wt.%) was purchased from TCI Chemicals Co., Ltd. HS-40 colloidal silica (40wt.% suspension in H2O) was purchased from Sigma-Aldrich. It was dried and calcined into a solid before being used. Silica sand (80-120 mesh and 120-150 mesh) was purchased from Macklin Inc**.** Ar(99.99%), CH4(99.99%), H2(99.99%), and D2(99.9%) were high purity. All chemicals were used as received without further purification.

**Hydroxyl Group Removal Experiment****.** A U-shaped quartz tube replaced the straight version, and the catalyst was packed to a height of 1.5 cm. The Ar flow of 40 mL/min was maintained, and the temperature was raised from ambient to 700 °C at 10 °C/min, then to 900 °C at 5 °C/min, then held at 900 °C for 90 minutes to remove surface hydroxyls. After cooling to room temperature, the feed gas was switched to 6 % CH4. After the flow had stabilized, the plasma was initiated.

**H2O-TPD.** Temperature-programmed desorption of H2O (H2O-TPD) was performed using a fixed-bed microreactor setup. In the experiment, 50 mg of catalyst was placed in the quartz tube and heated from 150 to 900 °C at 10 °C/min under flowing Ar (40 mL/min). The desorbed species were analyzed in real-time using an online mass spectrometer (MS, Shanghai Accurate MLS211). The desorption of H2O was confirmed by monitoring the signal at amu18.

**Hydrogenation Experiment.** To sharpen the conversion and selectivity trends, the plasma input power was fixed at 10 W. The total flow was kept at 60 mL/min with 6 % CH4, and H2 was stepped from 0% to 5% and 10%. Products were analyzed by on-line gas chromatography (Agilent 8890).

**Supplementary Figures**

**
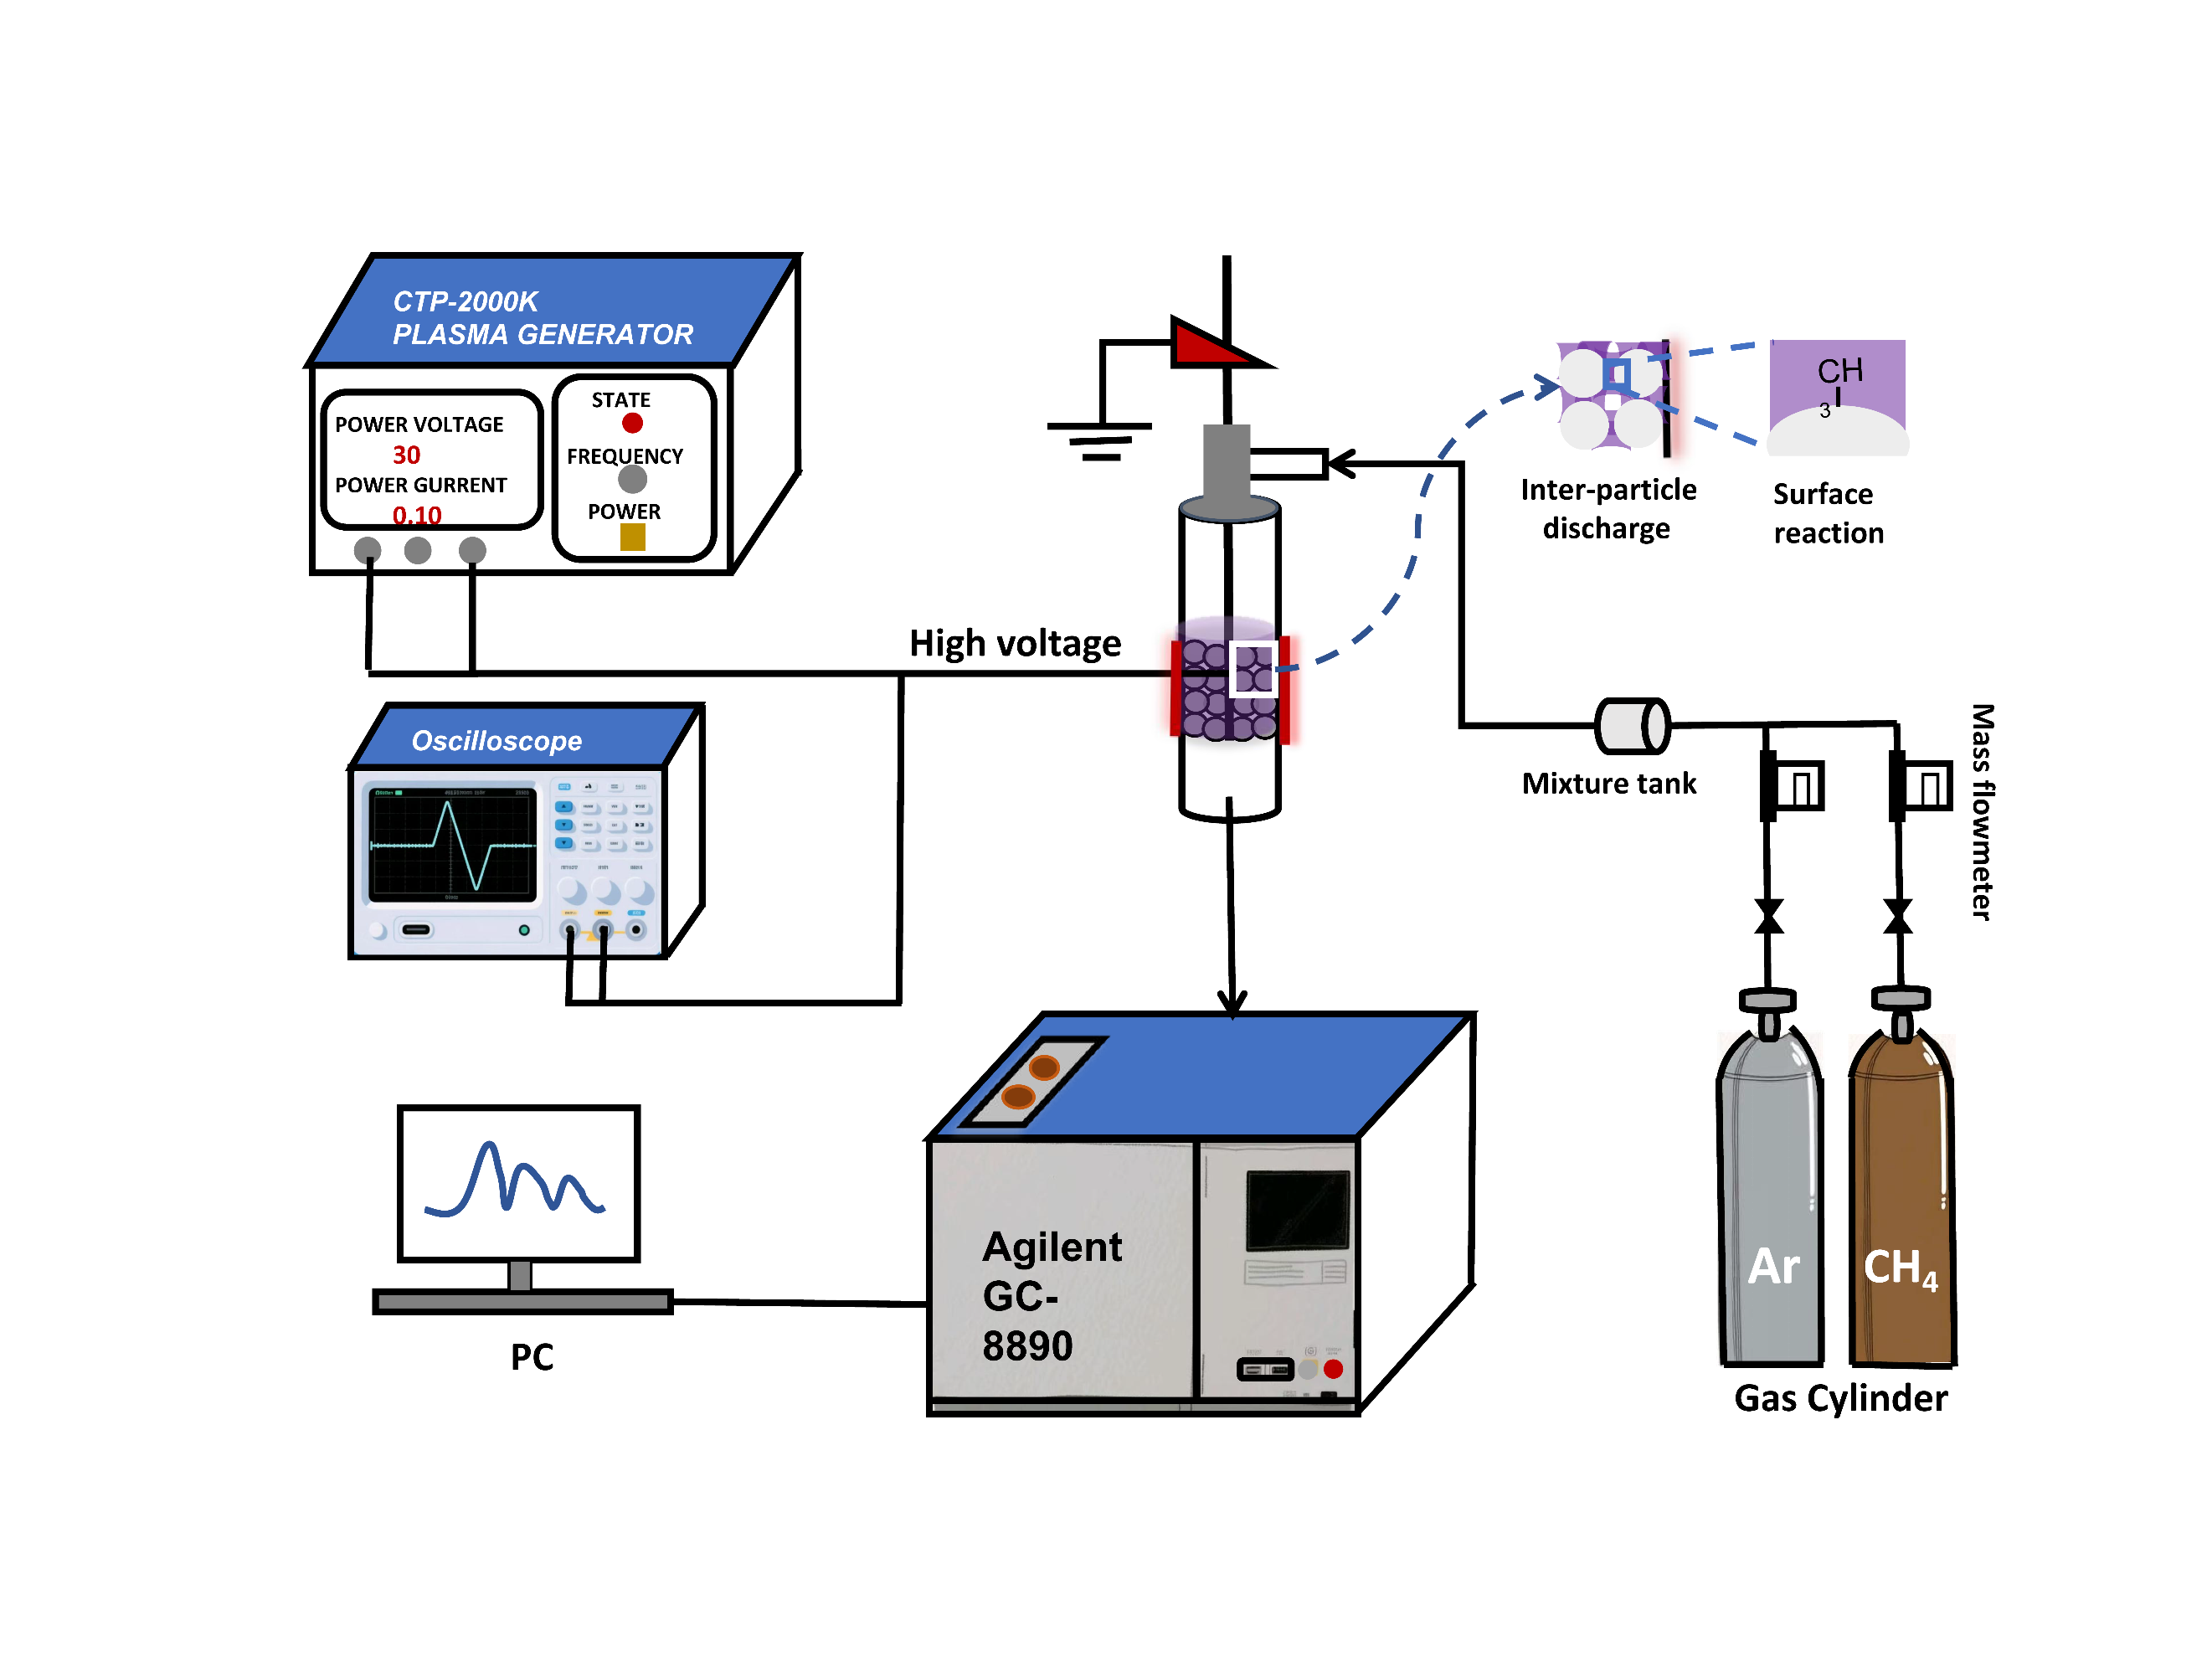
**

Figure S1. Schematic diagram of the plasma-assisted catalytic reaction apparatus.


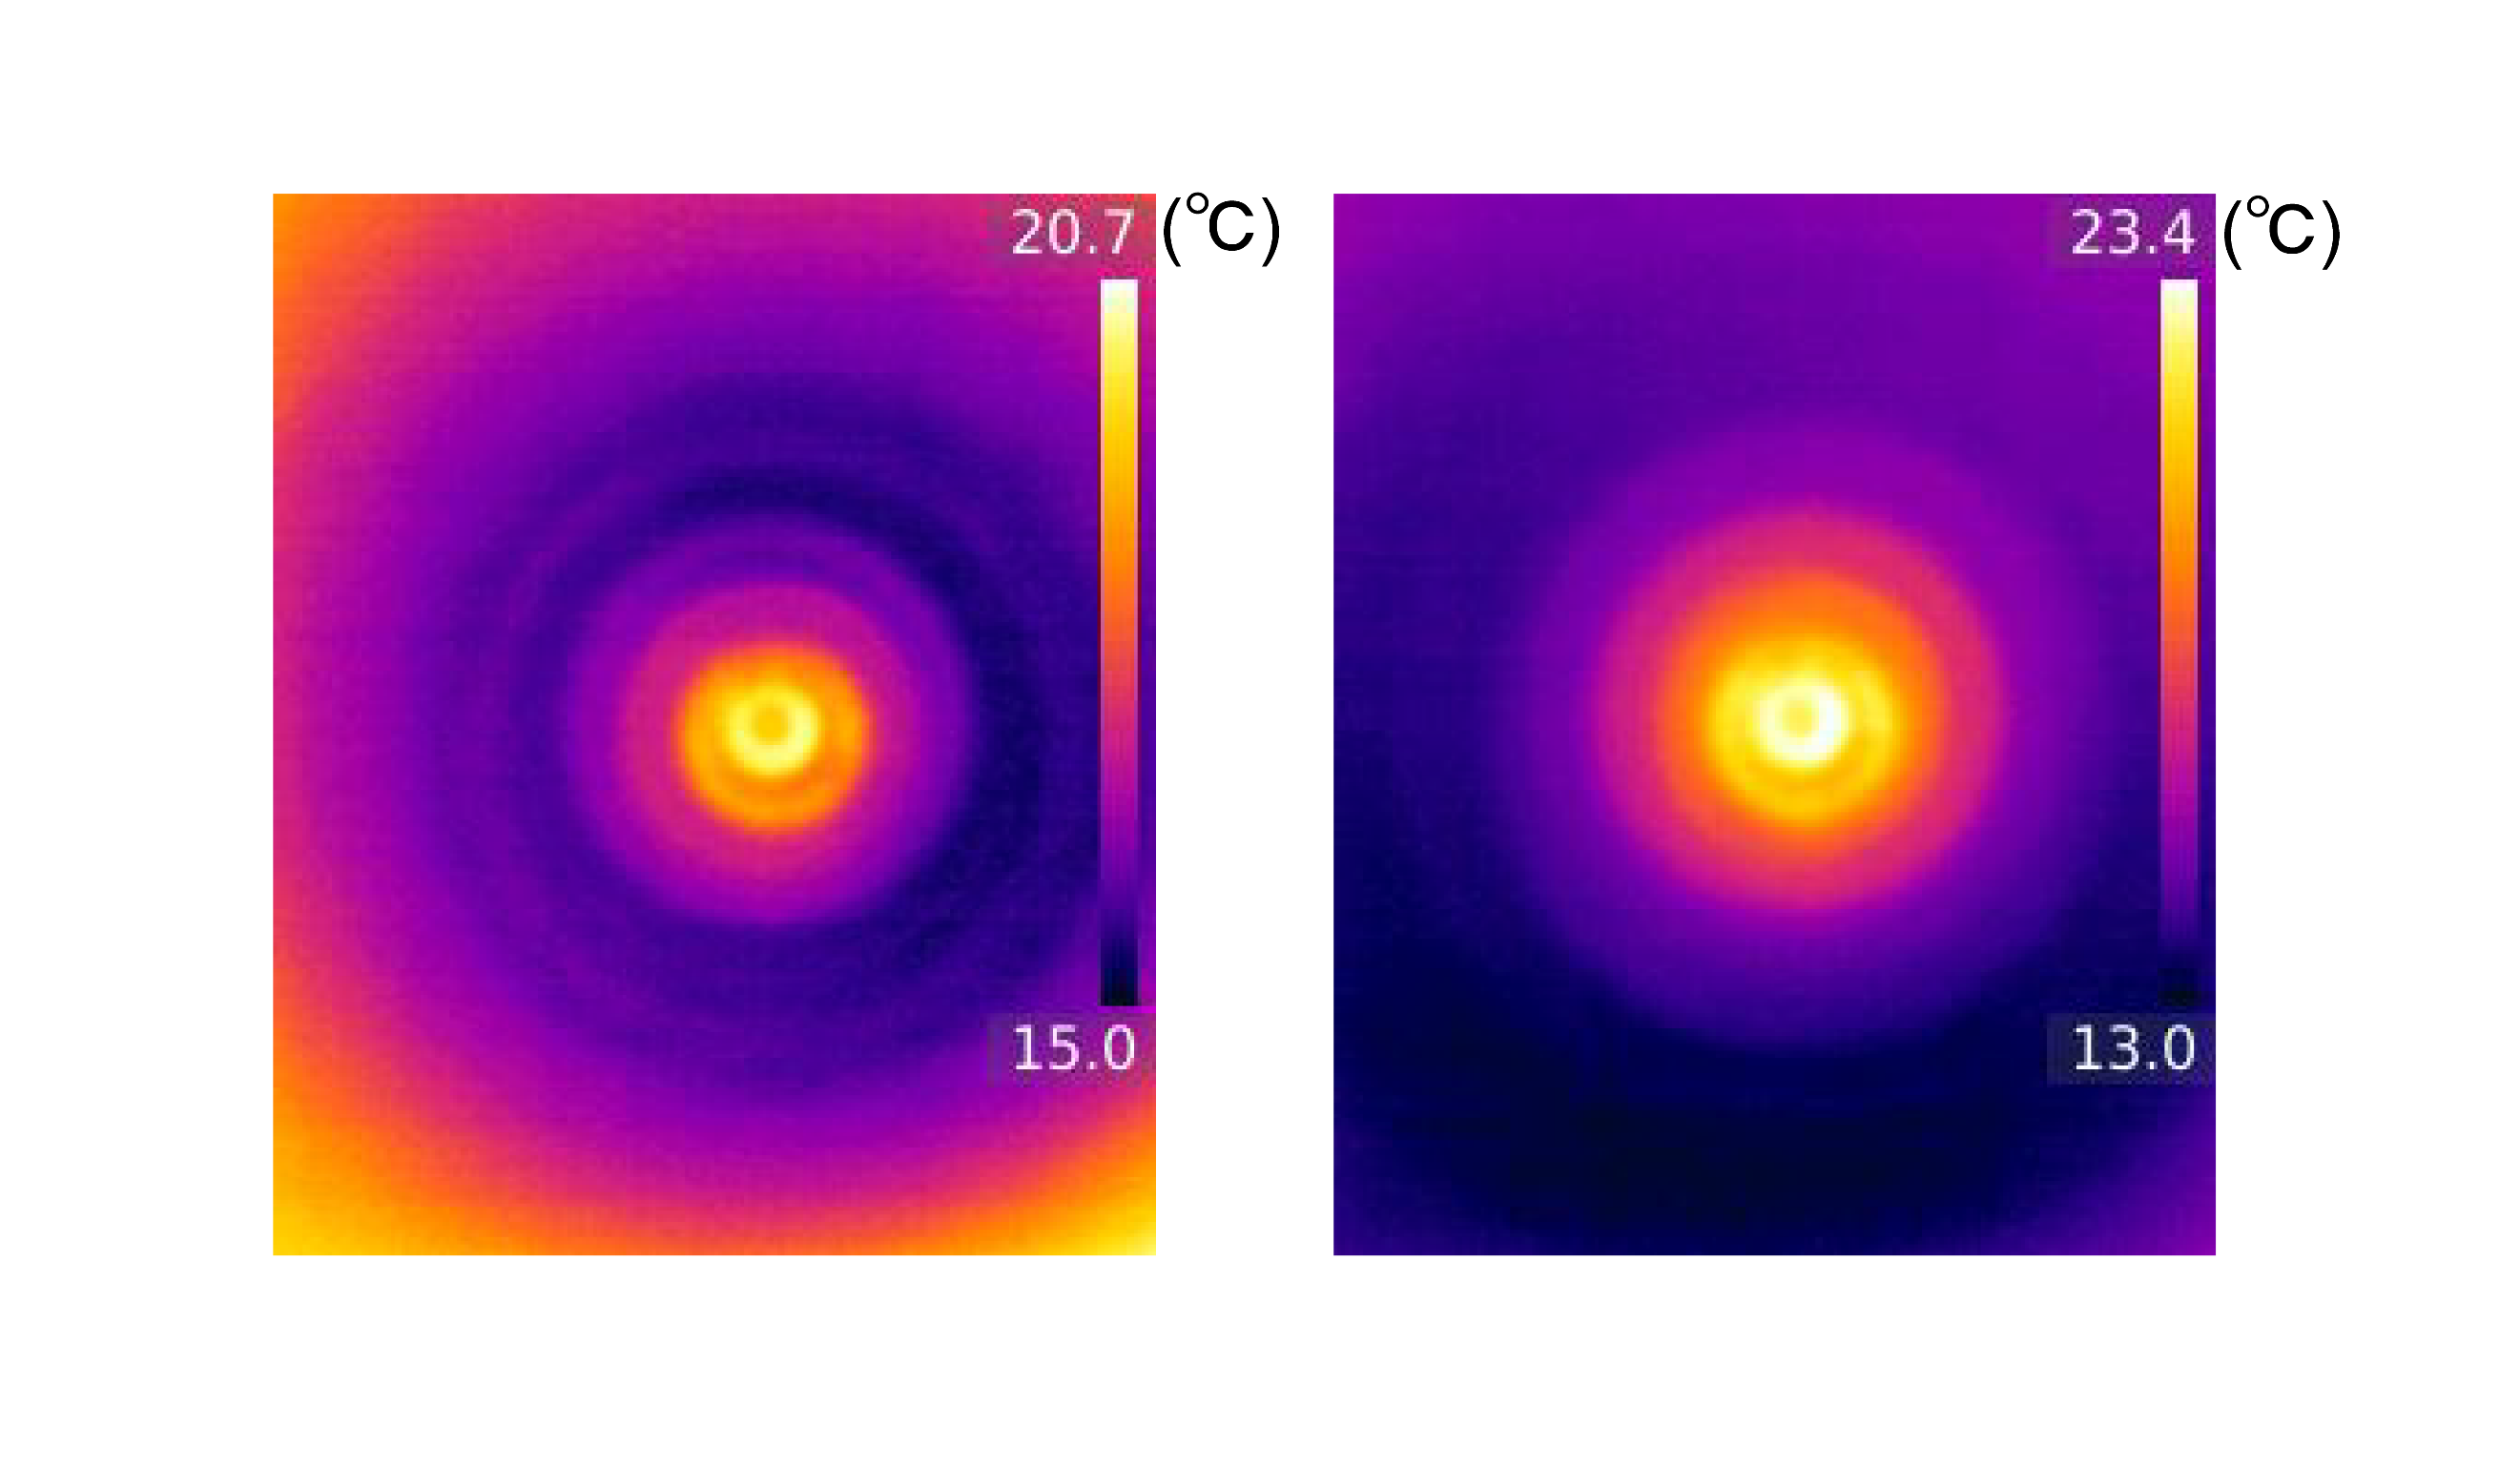


**a**

Figure S2. The reaction temperature measured by an infrared camera for (a) blank and (b) SiO2 with an input power of 3 W.


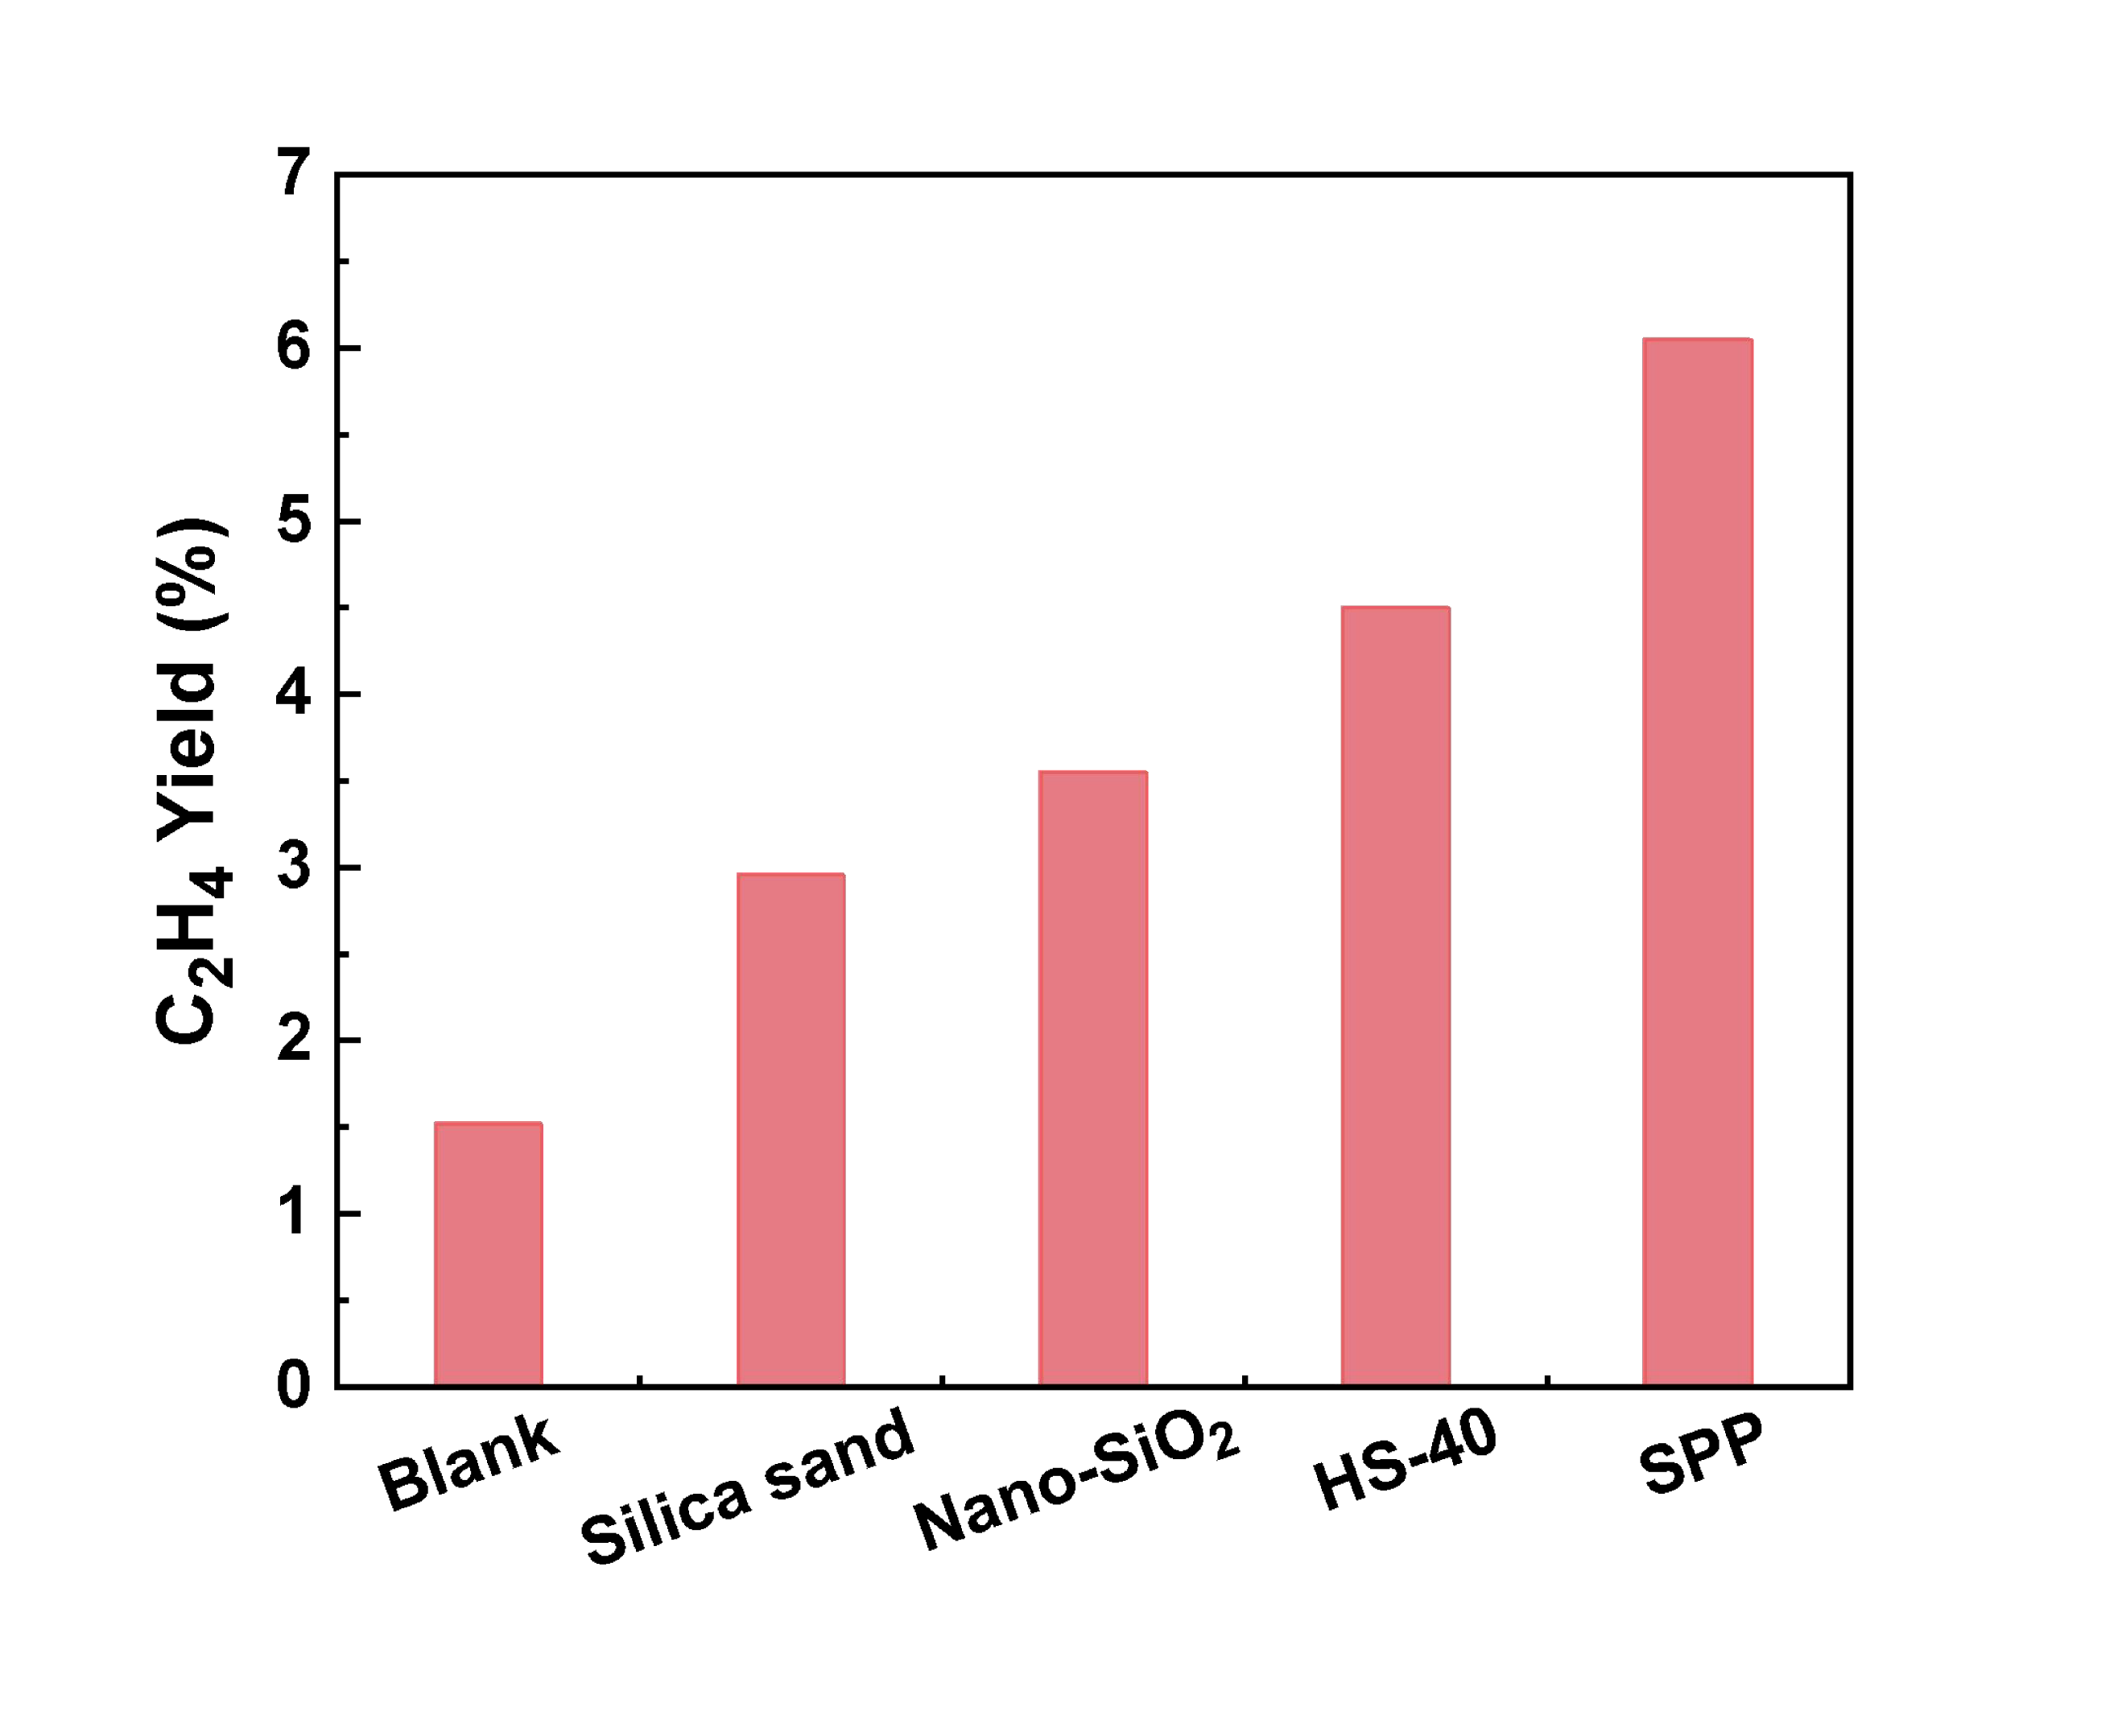


Figure S3. Comparison of ethylene yield over different catalysts. Reaction conditions, 3 W input power, 60 ml/min total flow rate, 6% CH4 in Ar, 25 °C, 1 atm.


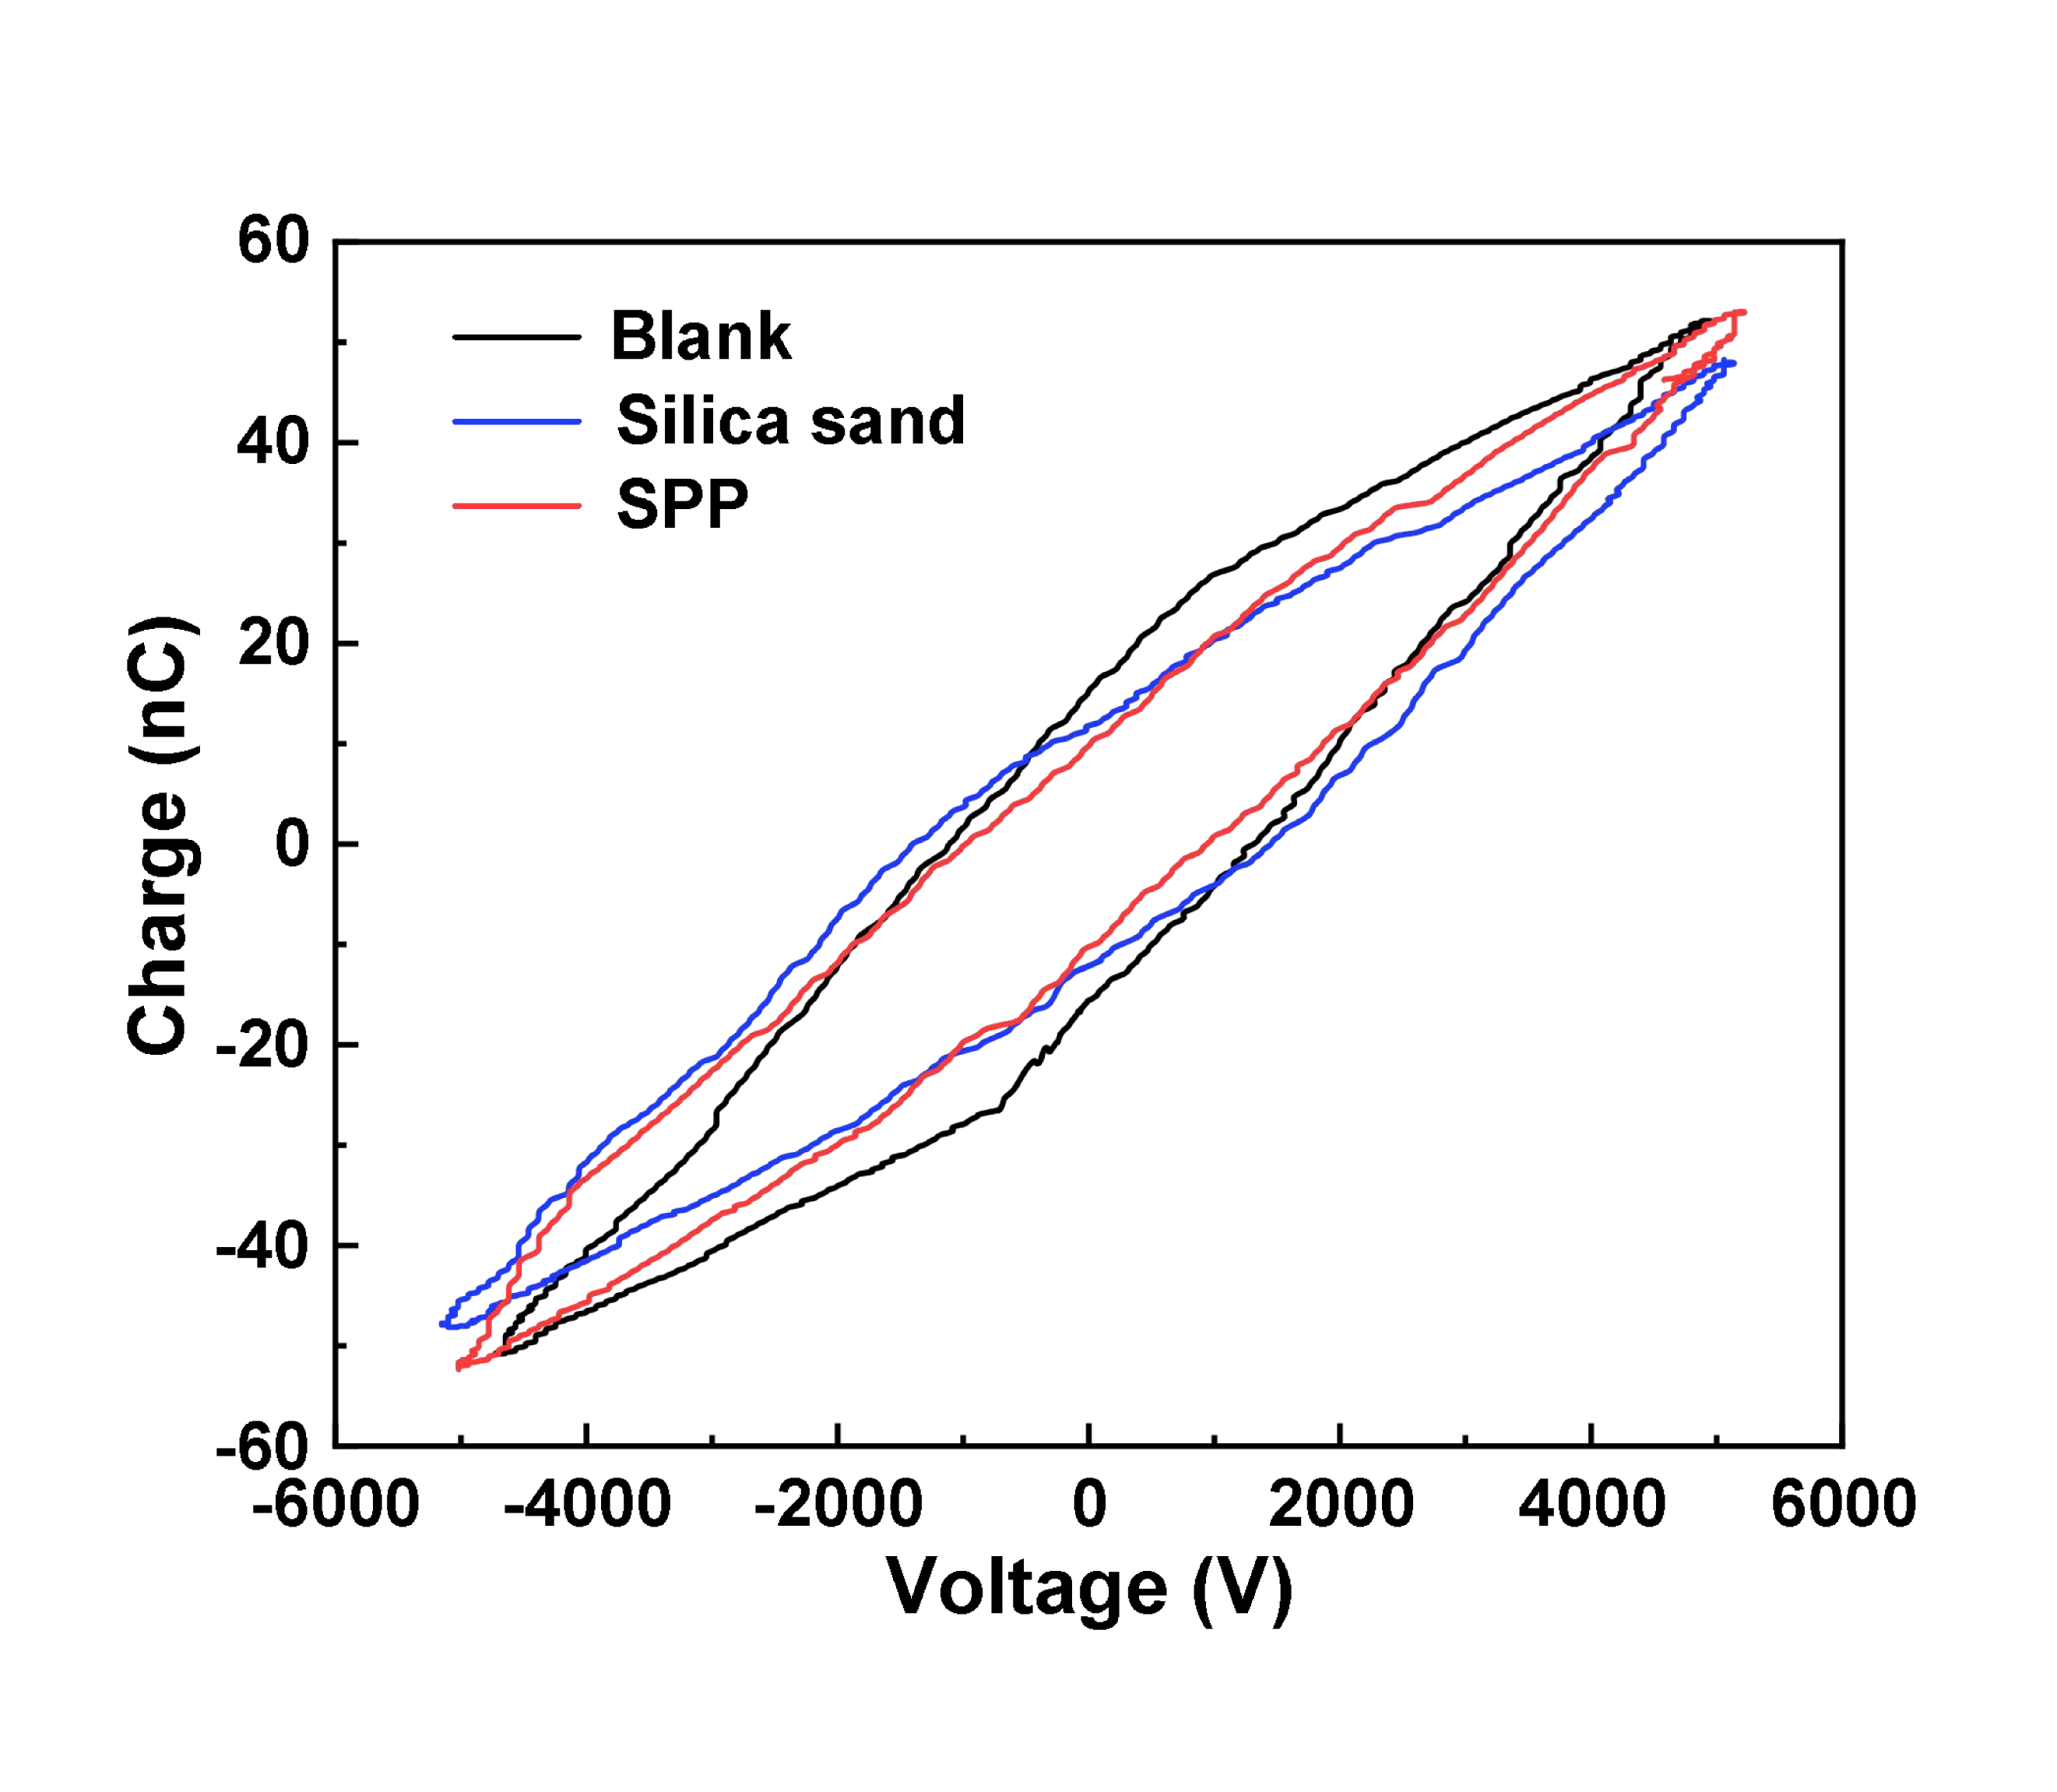


Figure S4. Lissajous plots of Blank, silica sand, and SPP under conditions of an input power of 3 W, a total flow rate of 60 ml/min, and a CH4 concentration of 6%.


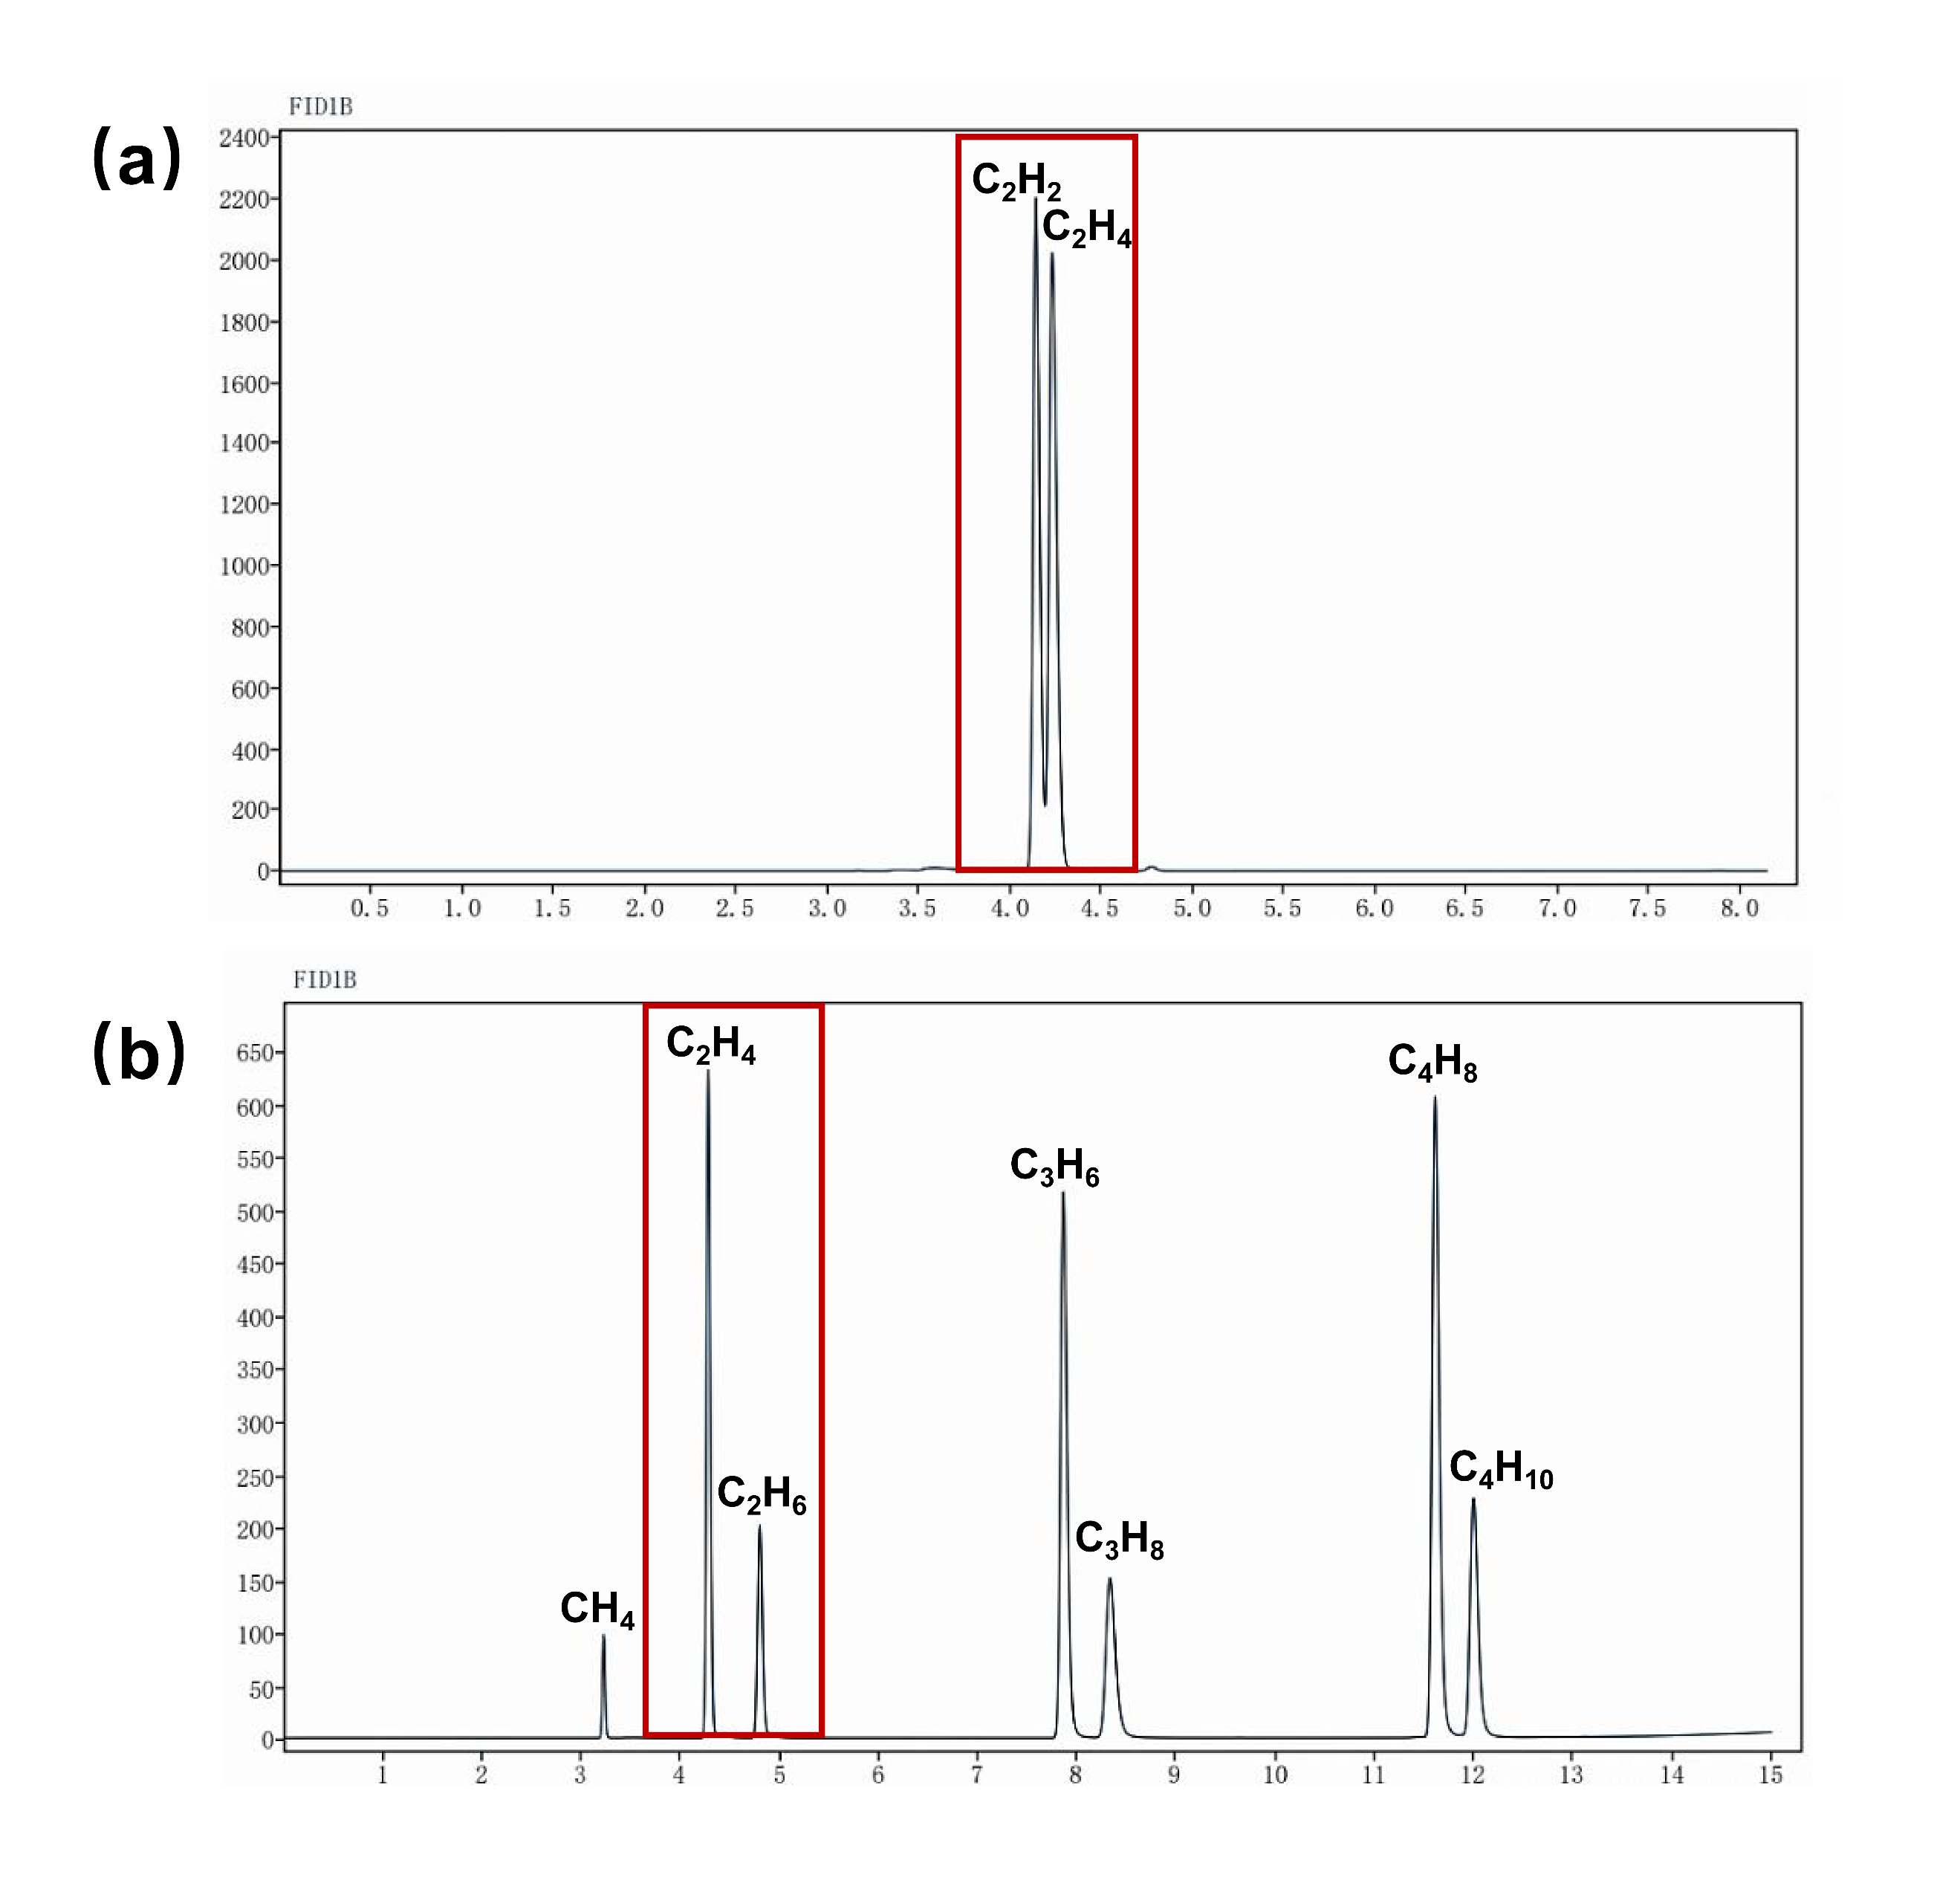


Figure S5. (a) Gas chromatogram for co-injection of acetylene and ethylene; (b) Gas chromatogram for co-feeding of methane, ethylene, ethane, propylene, propane, butylene, and butane.


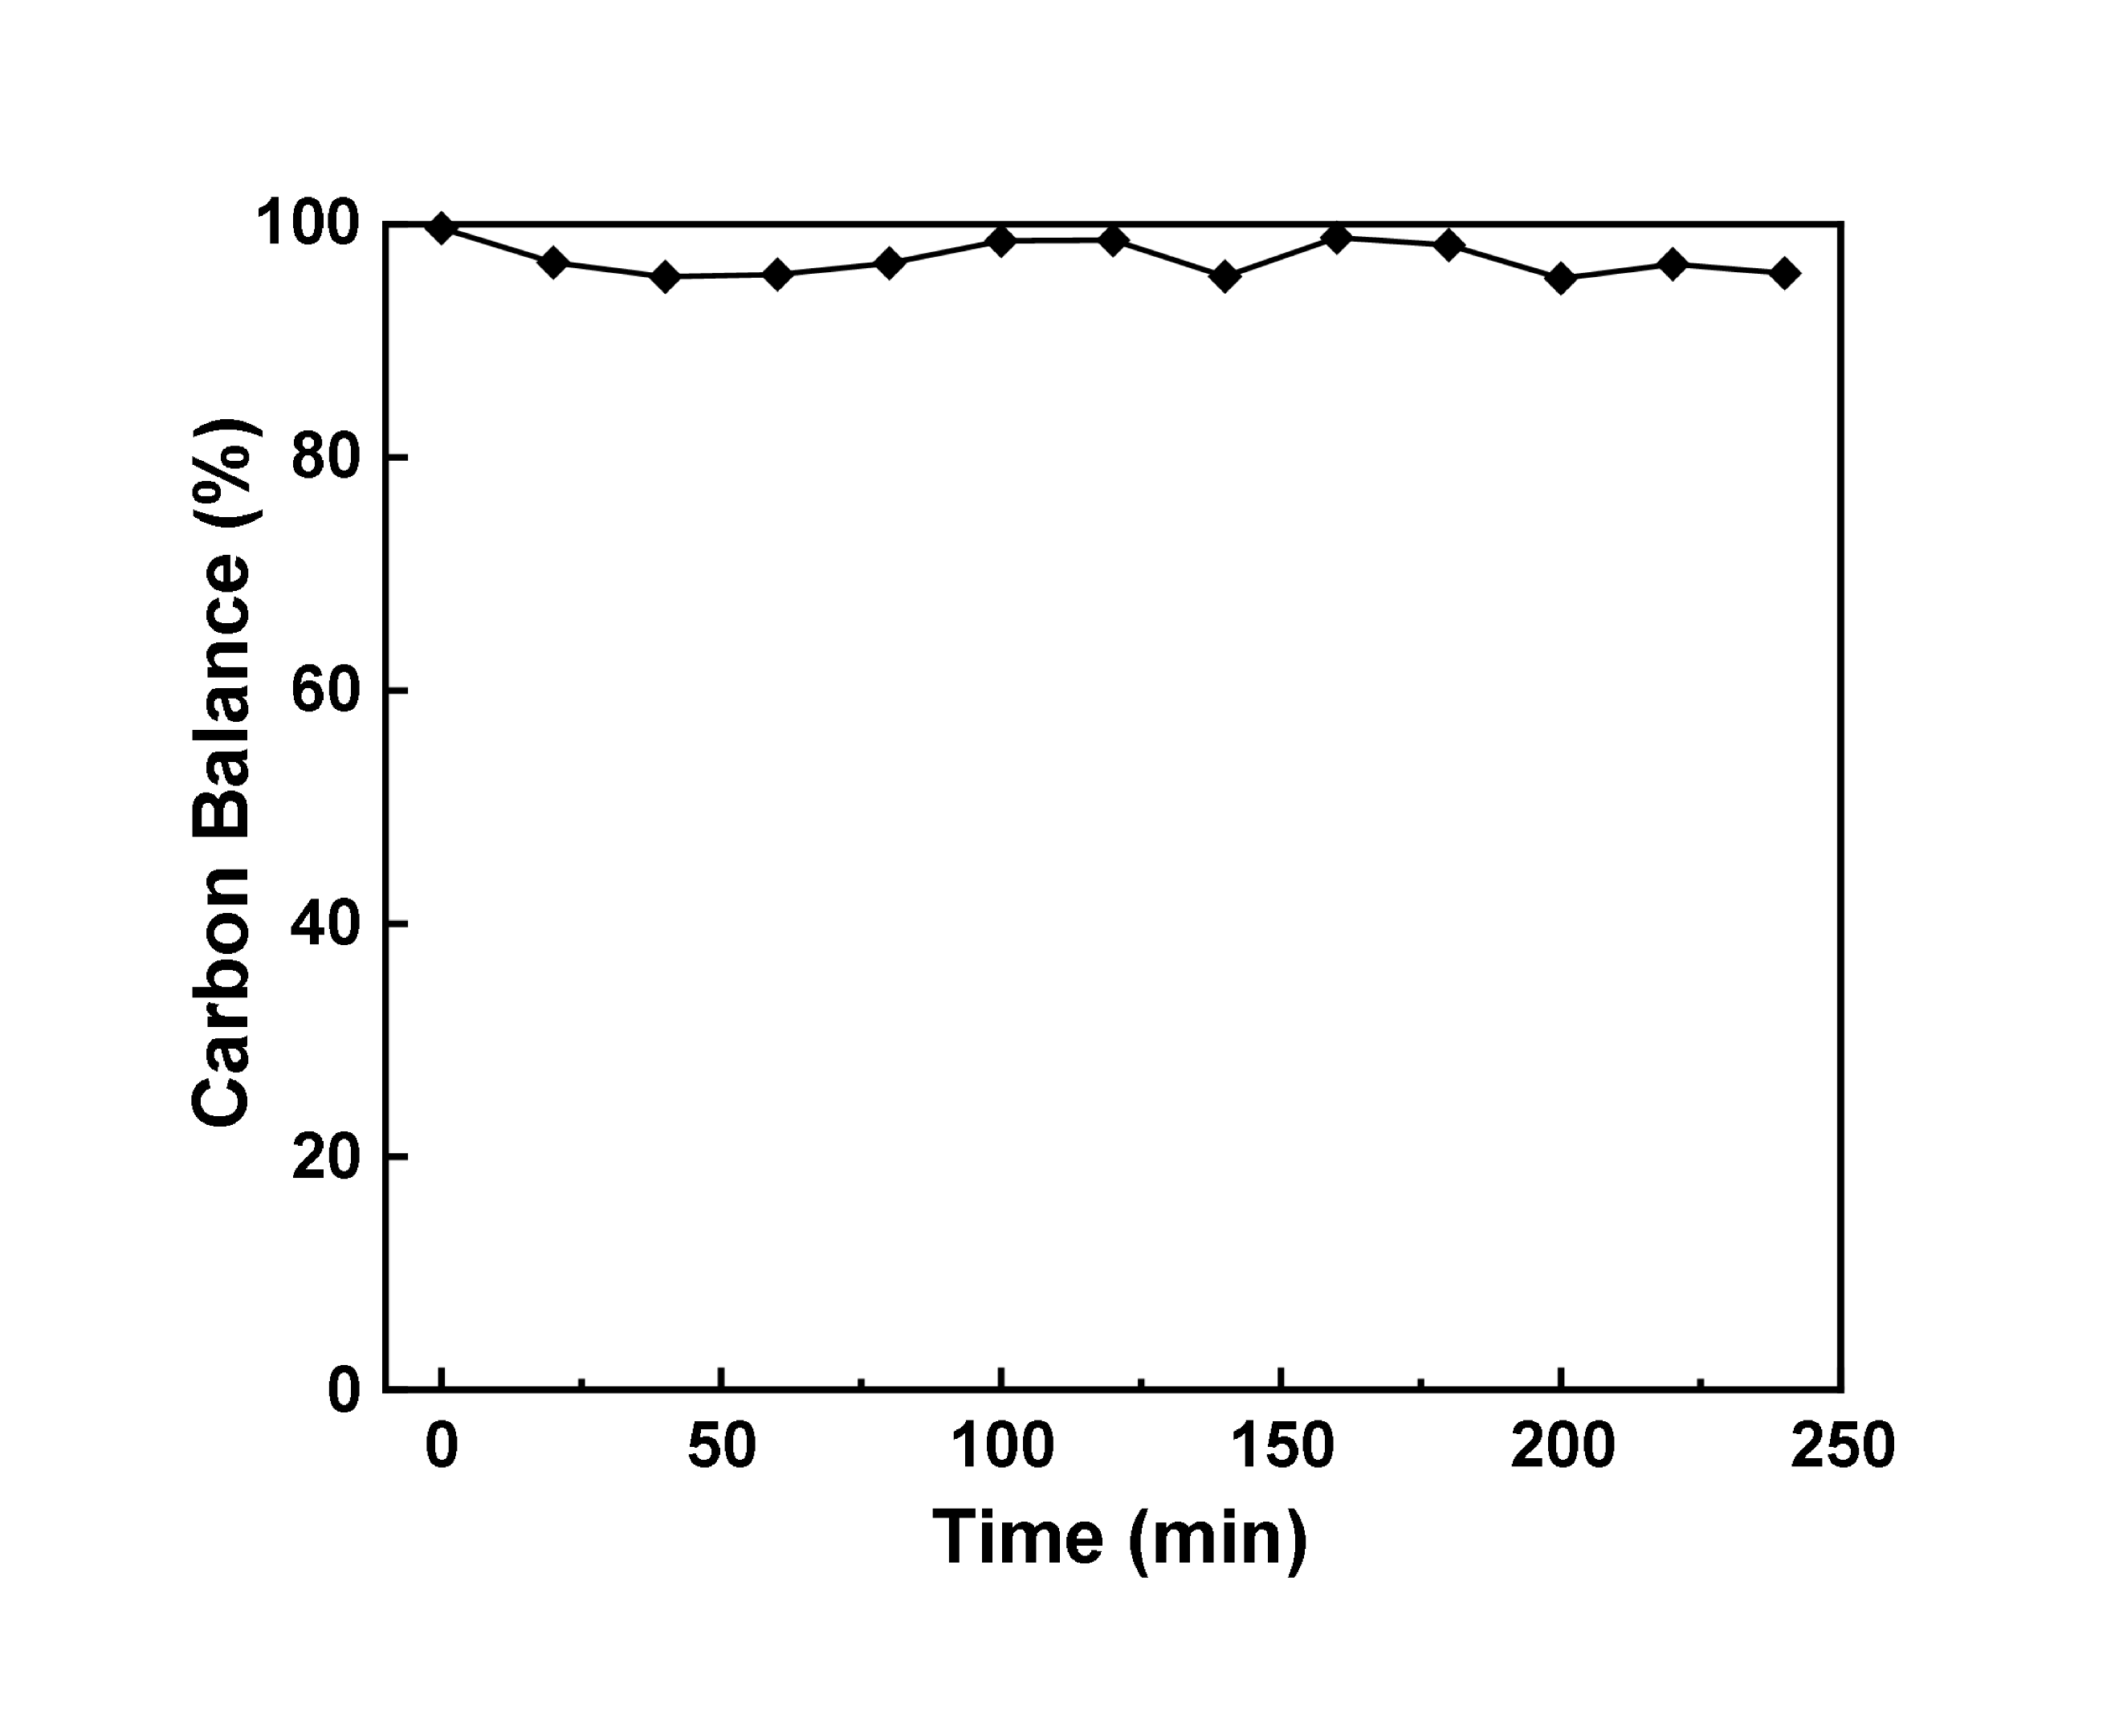


Figure S6. Carbon equilibrium for the reaction with SPP as catalyst. Reaction conditions: input power 3 W, total flow rate 60 ml/min, CH4 concentration 6%


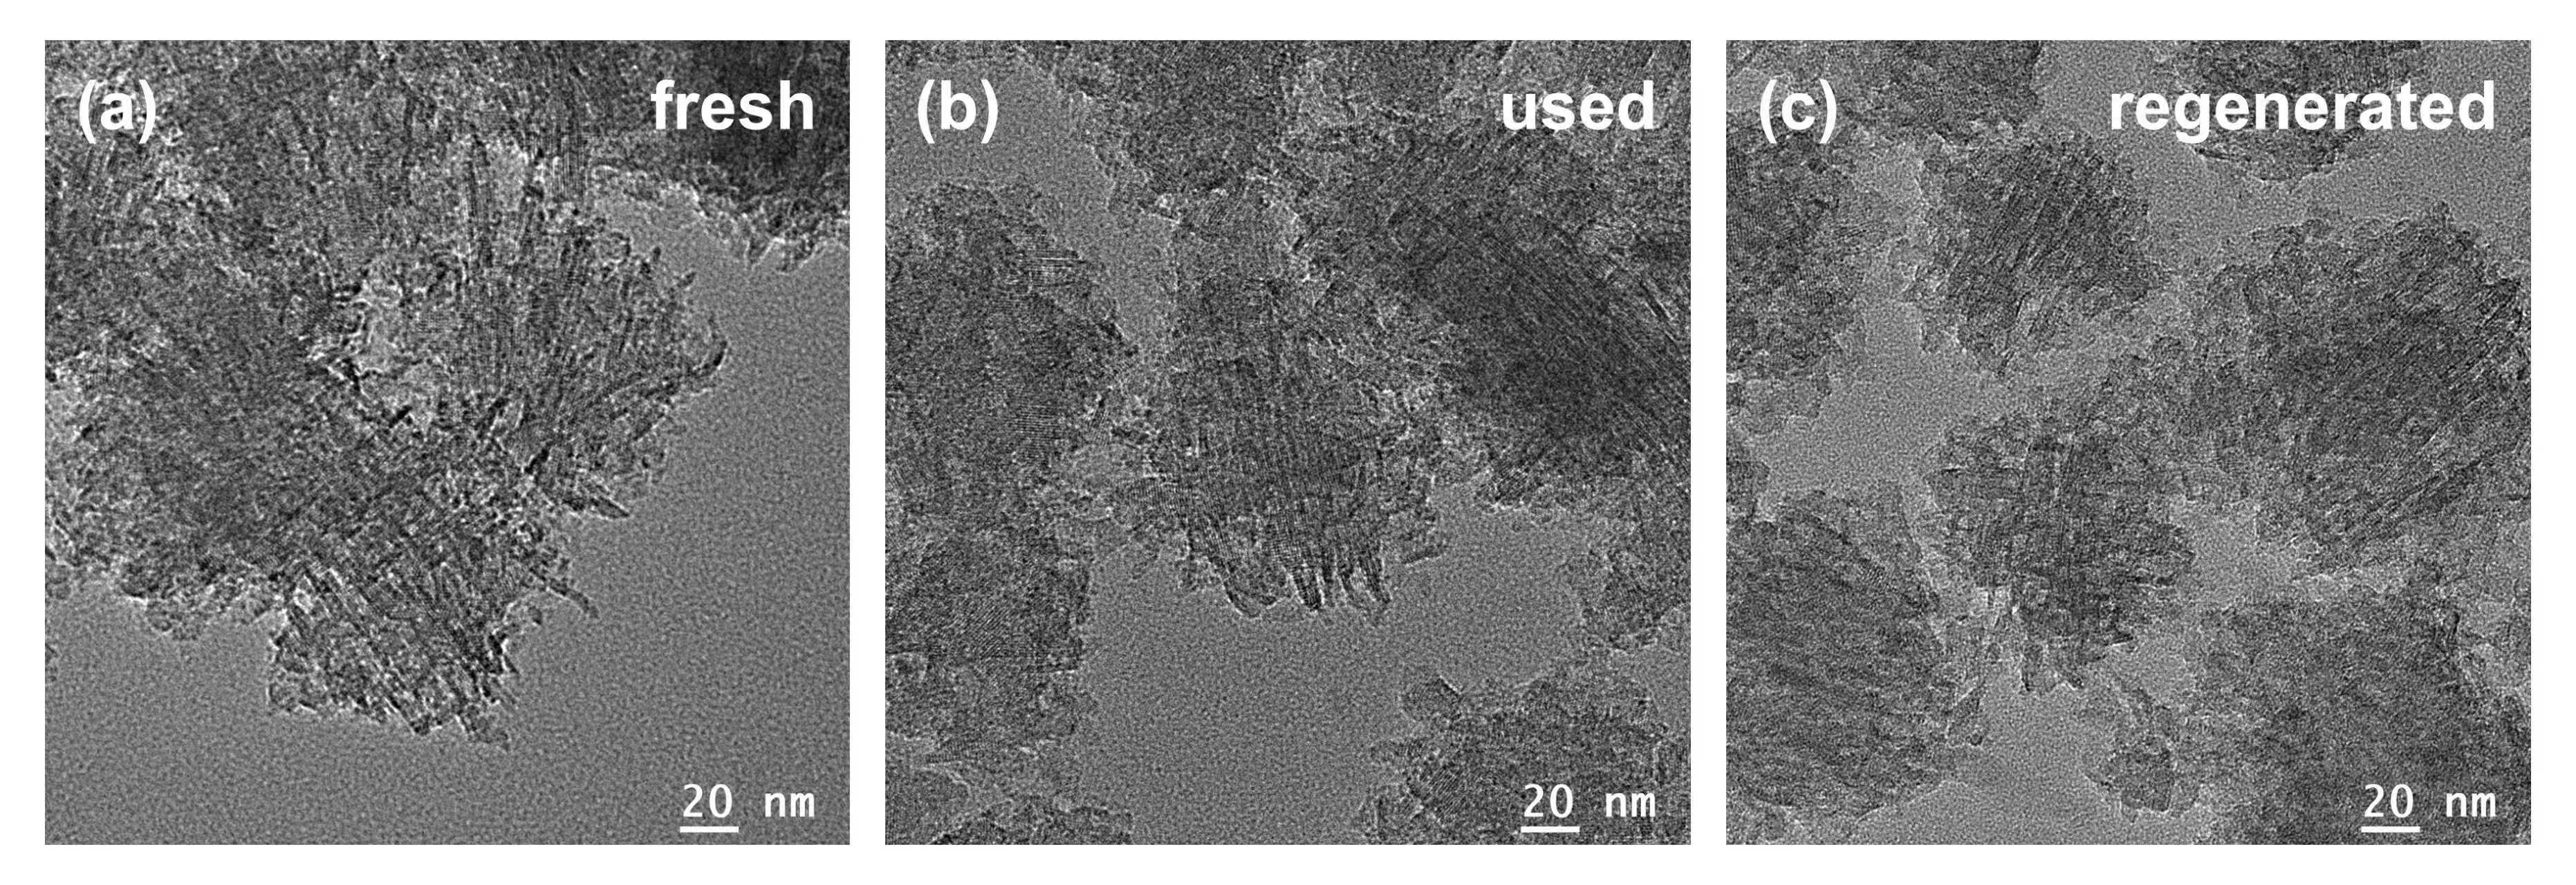


Figure S7. High-resolution transmission electron microscopy images of (a) fresh SPP, (b) reacted SPP and (c) O2-plasma regenerated SPP.


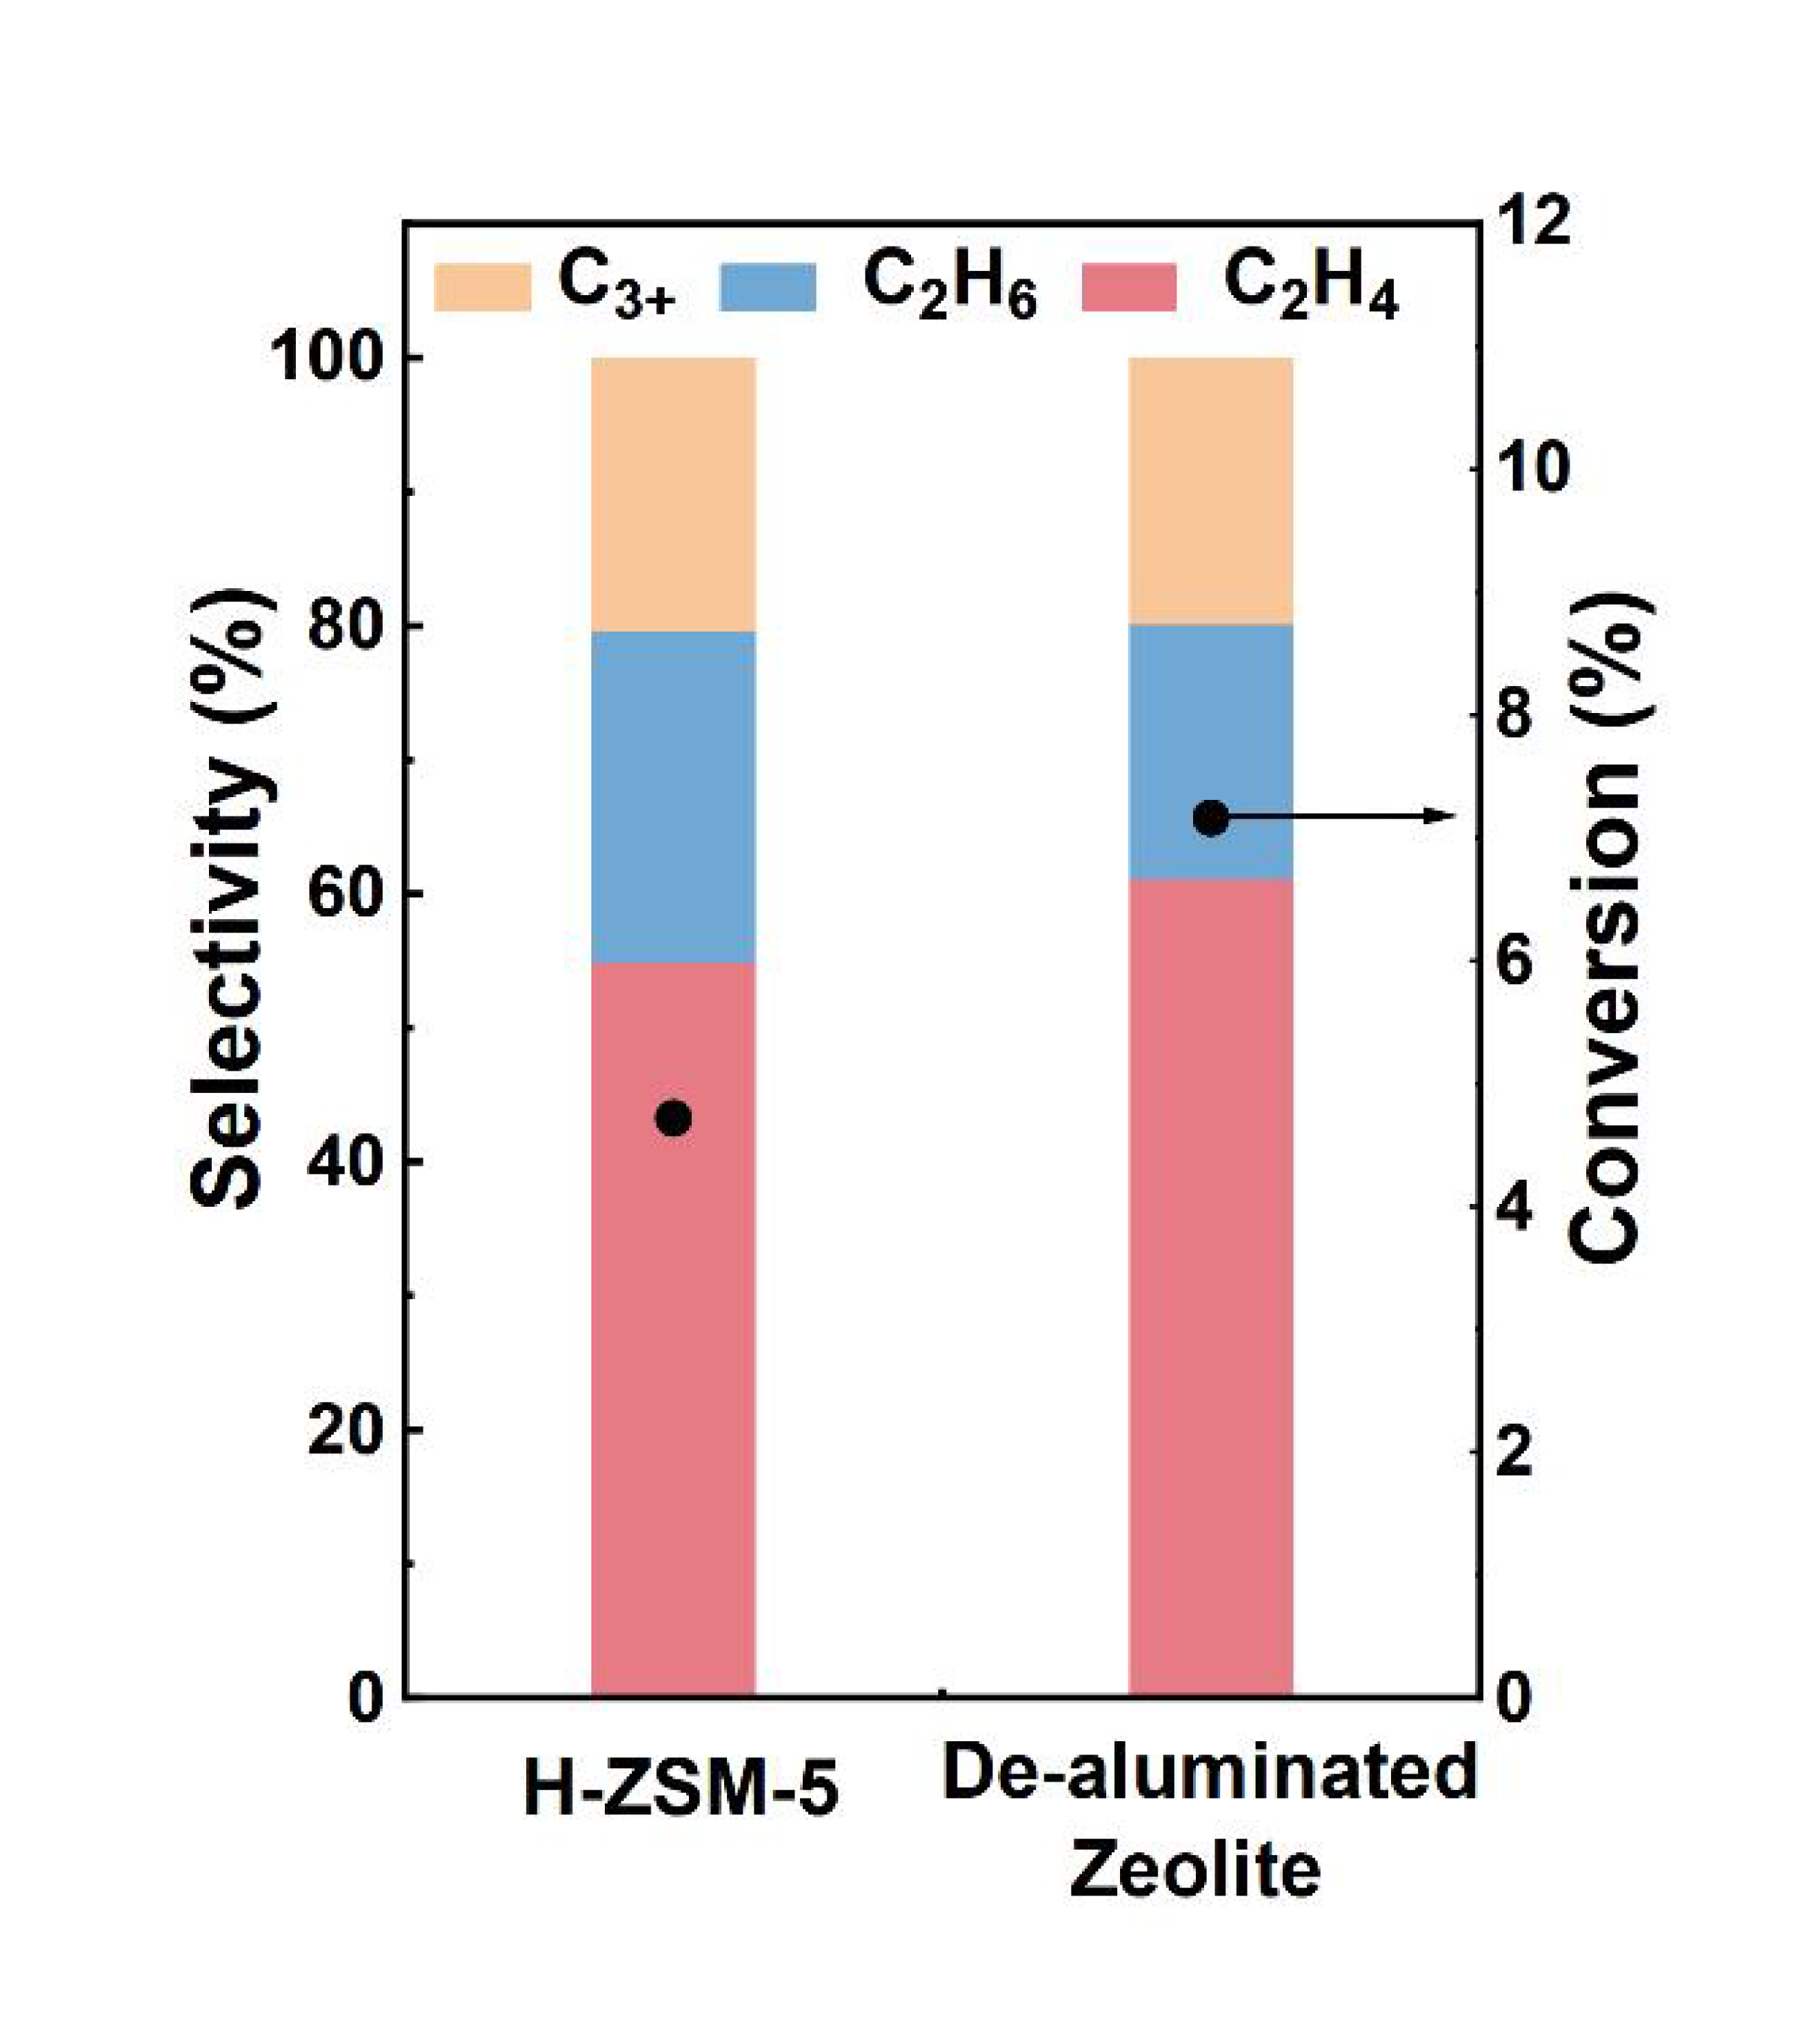


Figure S8. Comparison of conversion and selectivity between H-ZSM-5 and De-aluminated zeolite. Reaction conditions: 3 W input power, 60 ml/min total flow rate, 6% CH4 in Ar, 25 °C, 1 atm.


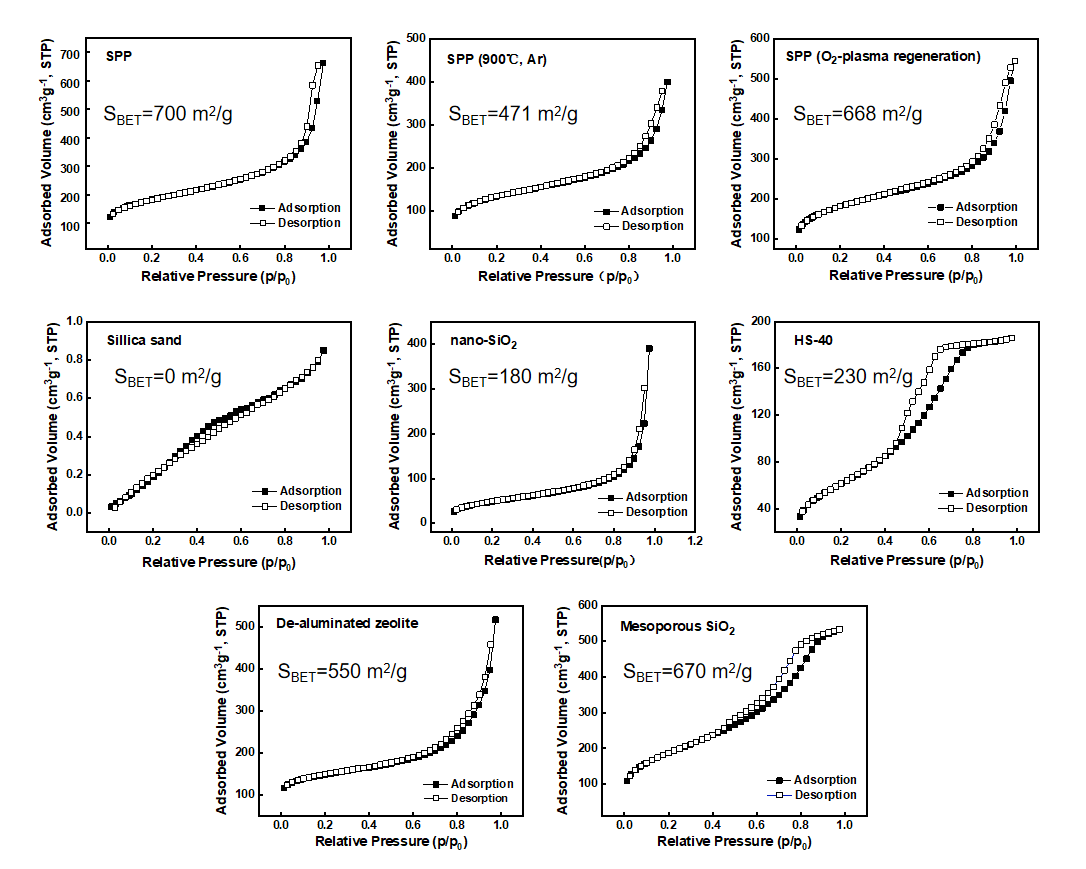


Figure S9. N2 adsorption and desorption isotherms.


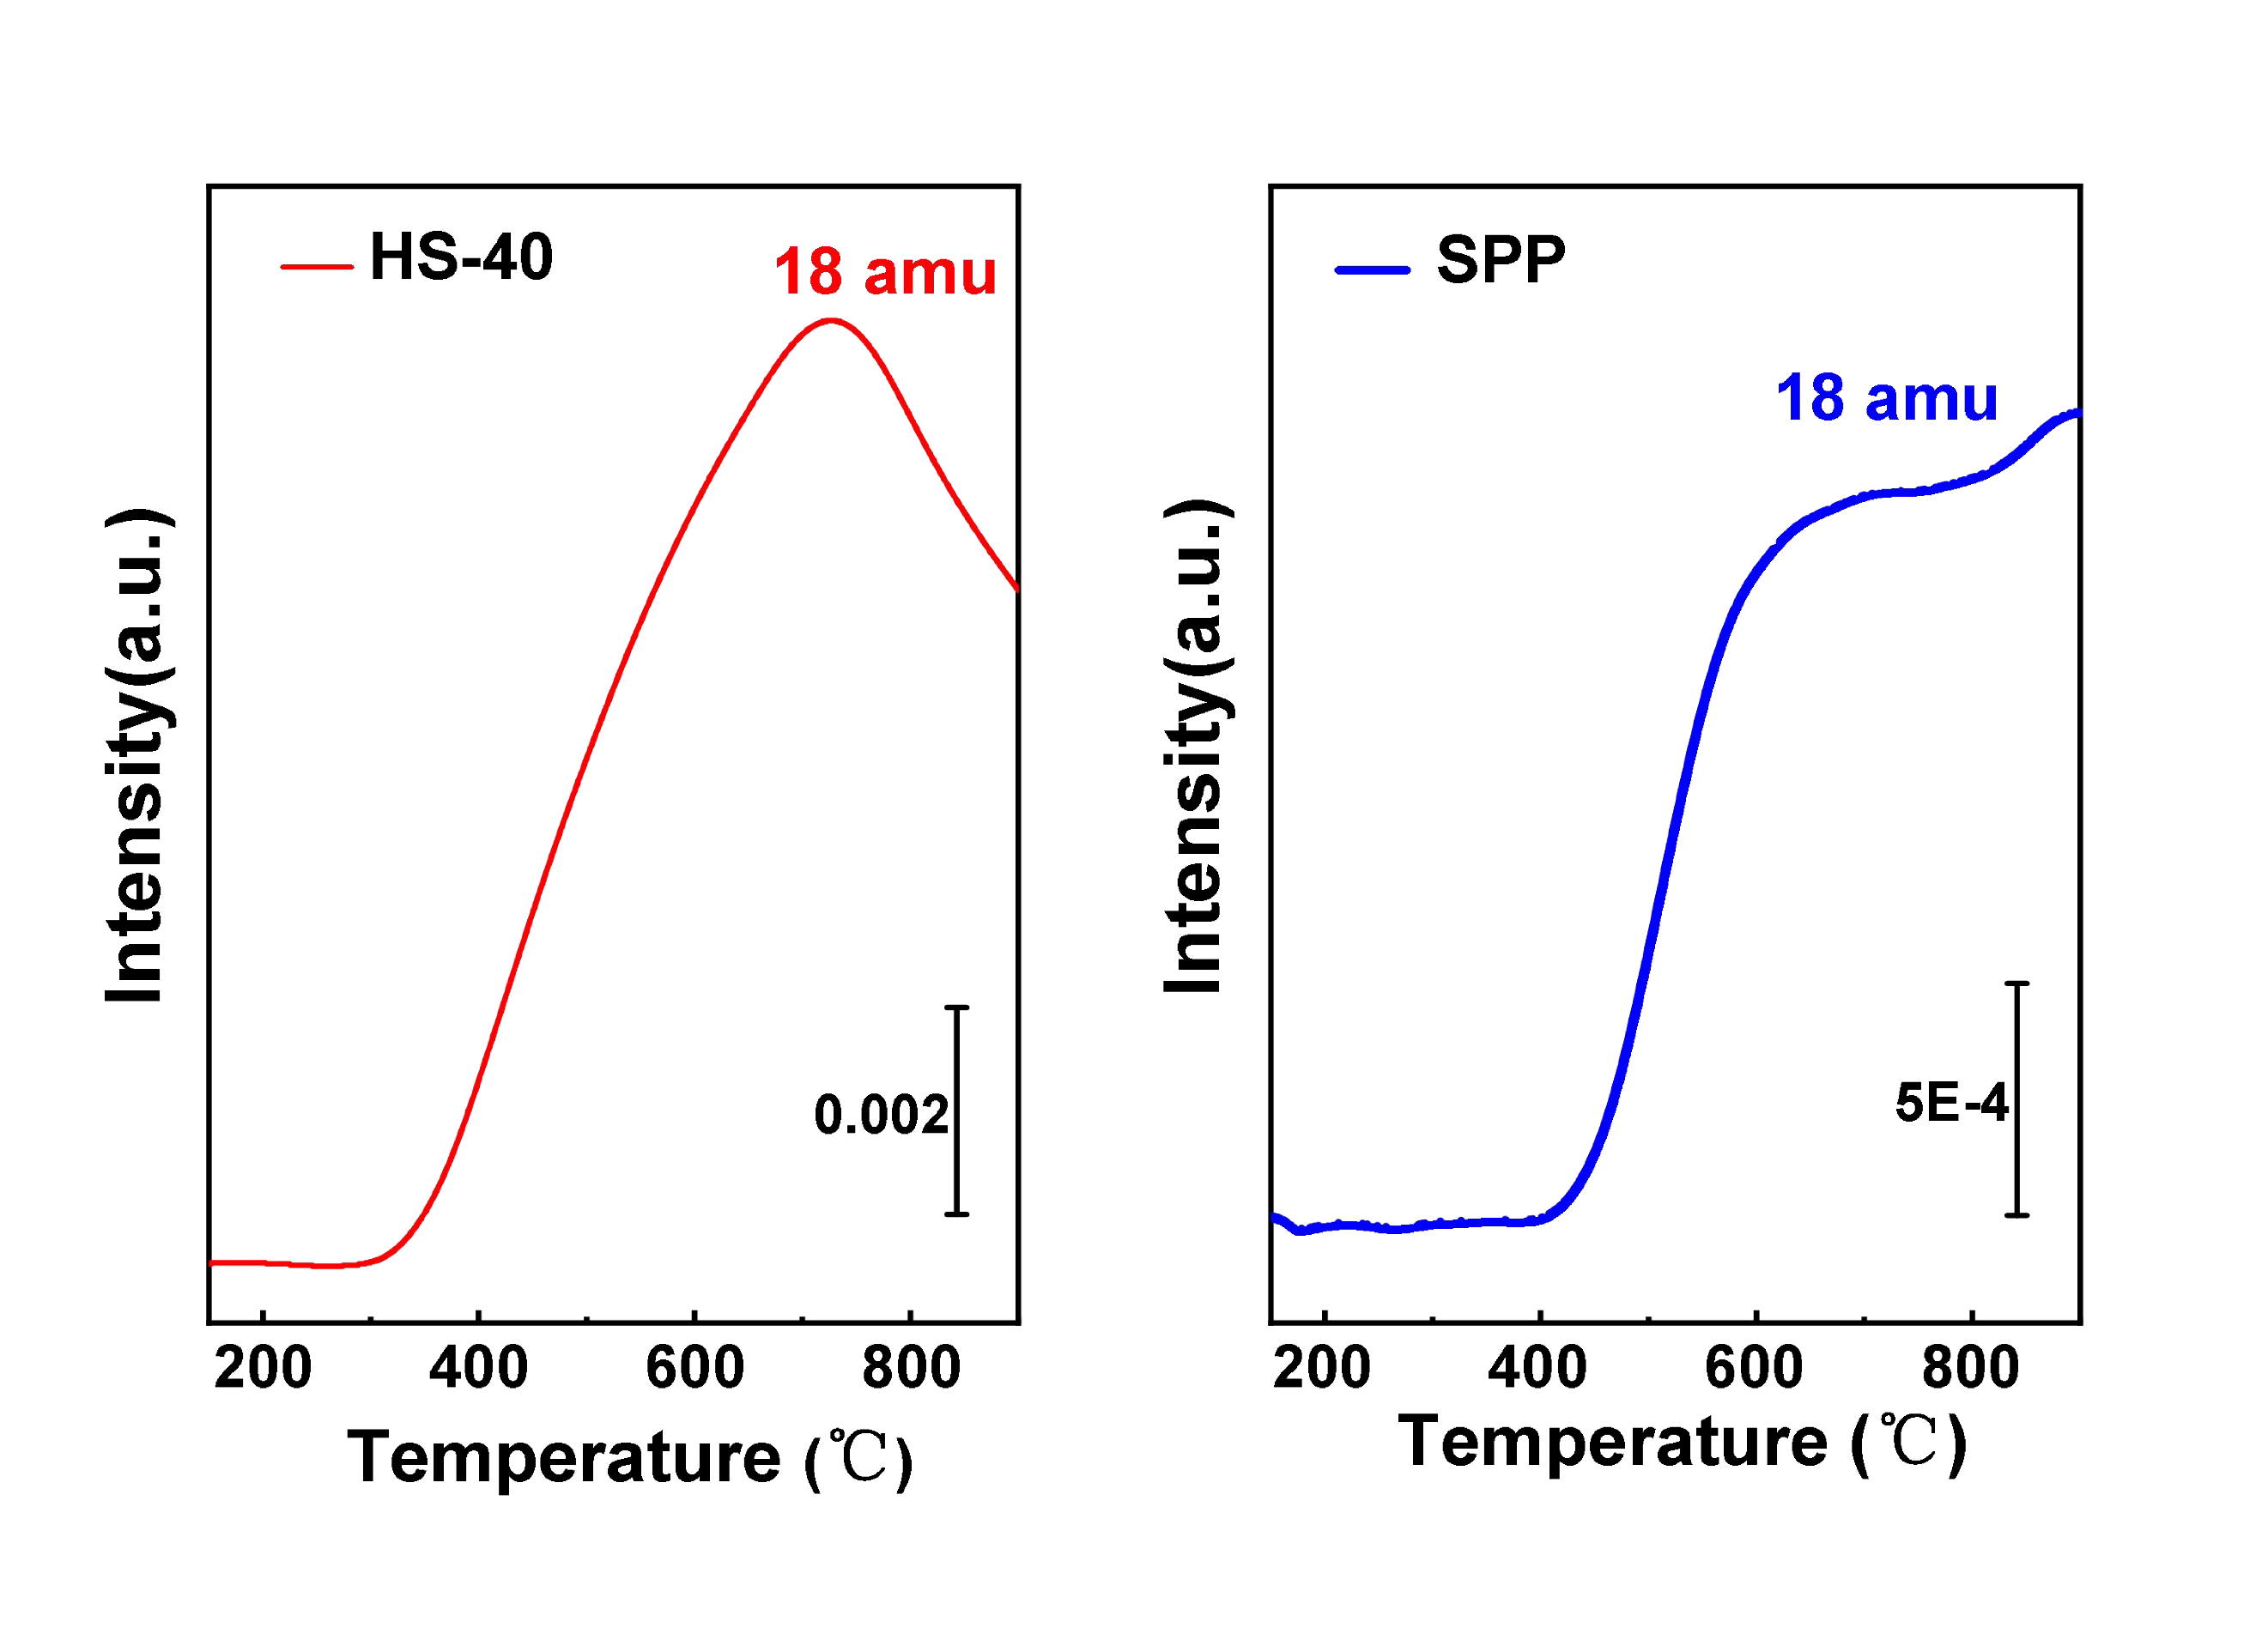


Figure S10. H2O-TPD profiles of HS-40 and SPP.

Hydrogen Temperature Programmed Desorption (H2-TPD) was conducted from 150 ℃ to 900 ℃ at a heating rate of 10 ℃/min. The results revealed the dehydroxylation temperatures of HS-40 and SPP are approximately 300 ℃ and 400 ℃.


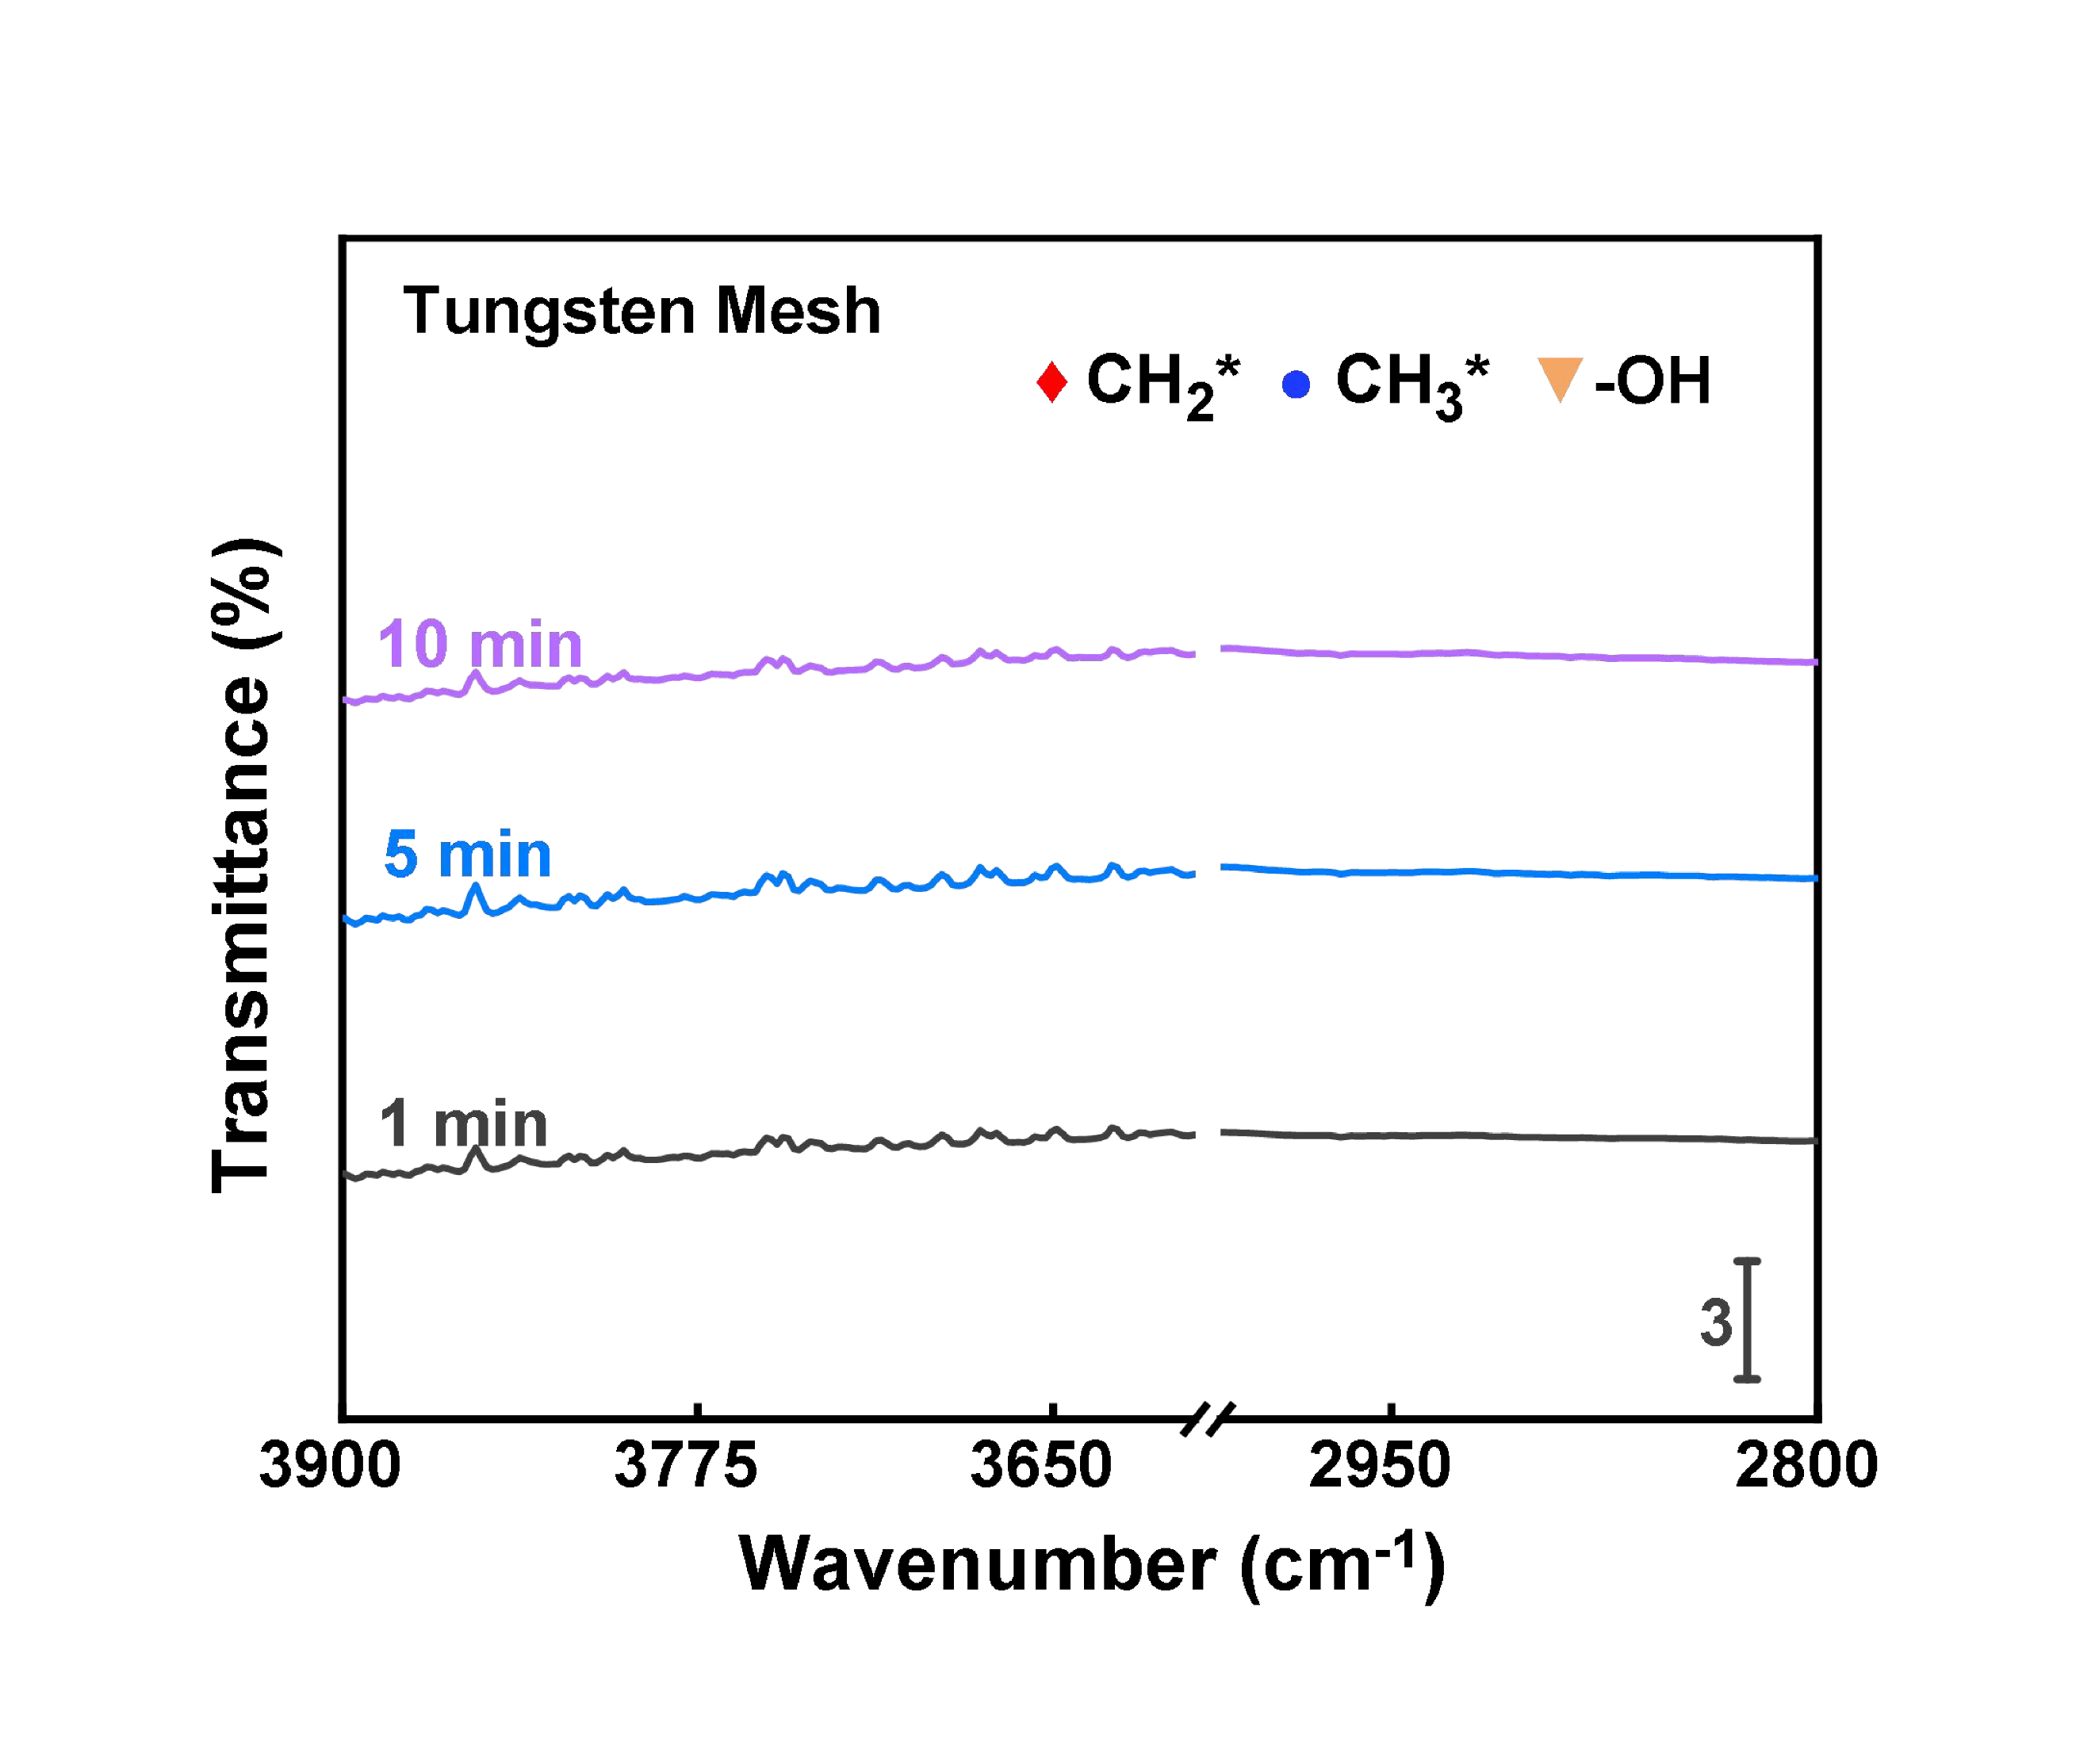


Figure S11. FTIR spectra of the surface species formed on tungsten mesh by plasma-assisted non-oxygen coupling of methane. A mixture of 10 mL/min CH4 and 40 mL/min Ar was fed for 10 minutes under plasma treatment.


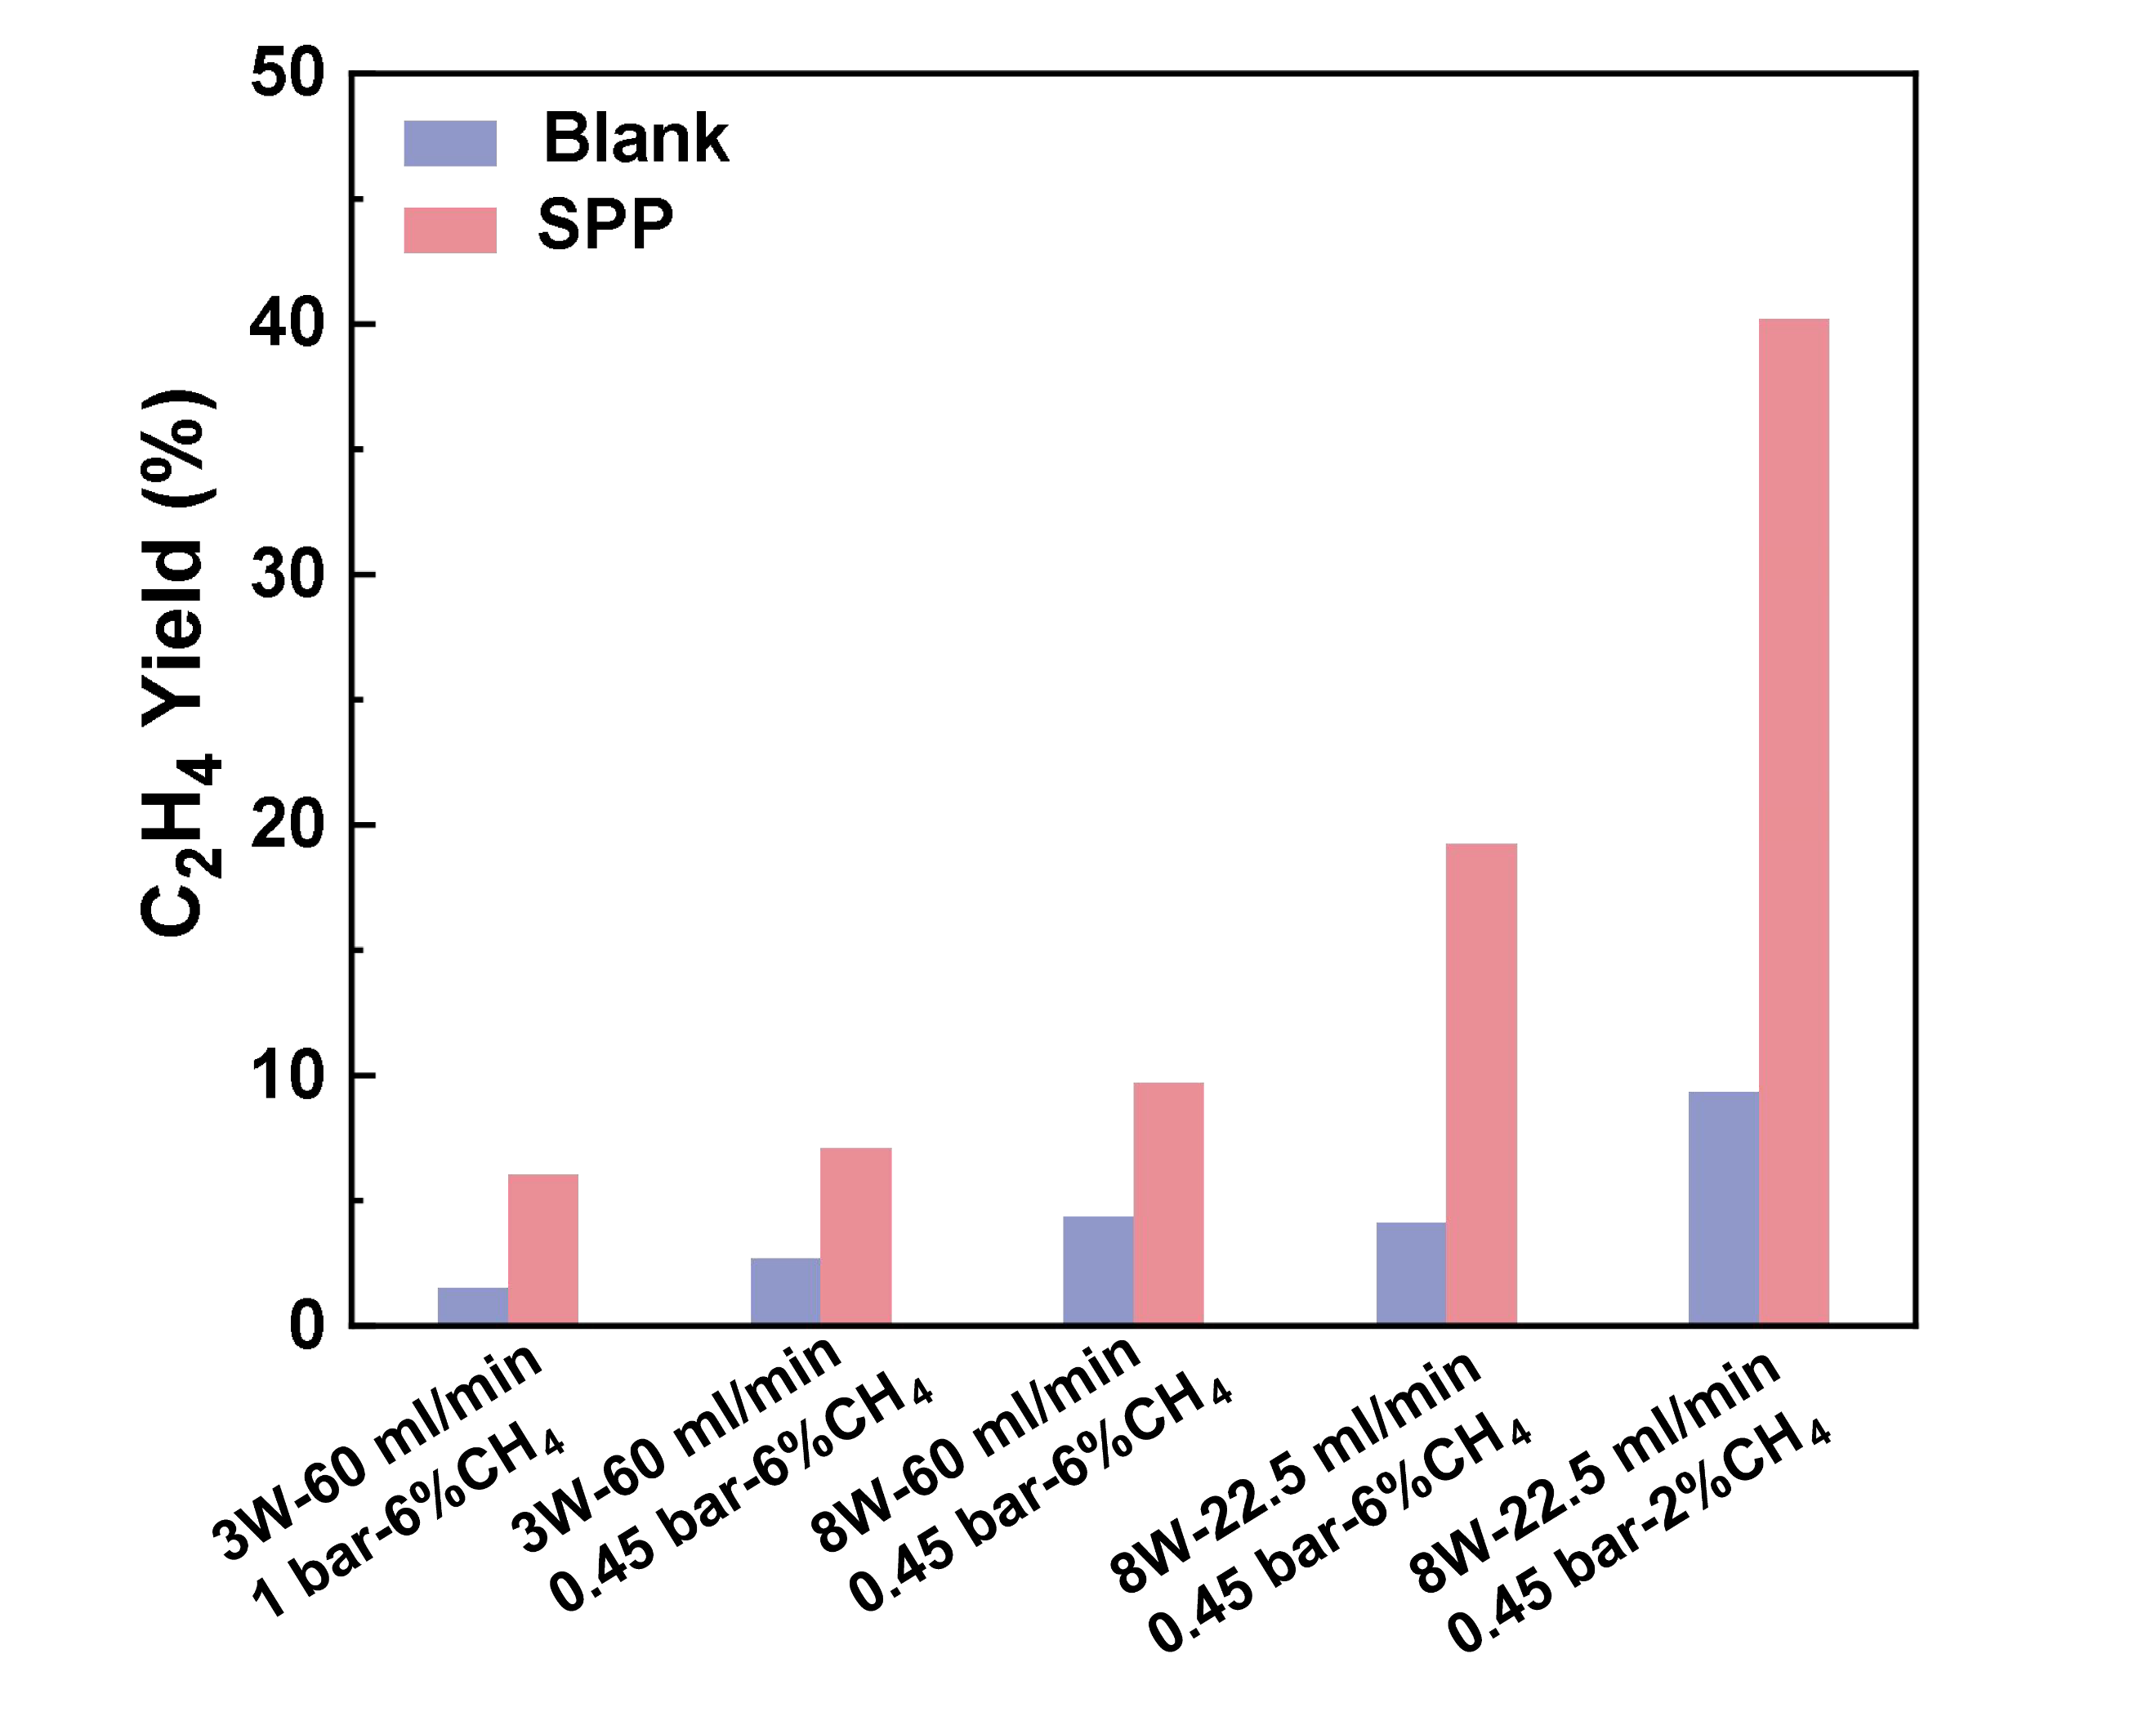


Figure S12. Ethylene yield of blank and SPP at different input powers (3 W, 8 W), pressures (1 bar, 0.45 bar), total flow rates (60 ml/min, 22.5 ml/min) and CH4 concentrations (6%, 2%).

Table S1. Comparison of the reported catalysts for CH4 conversion to C2H4 products.

| Catalysts | Reaction conditions | | CH4  conversion（%） | C2H4  Selectivity (%) | C2H4  yield (%) | Ref |
| --- | --- | --- | --- | --- | --- | --- |
| Type | Power (W) or temperature (K) |
| SPP | DBD | 3 | 10.1 | 58.8 | 5.9 | This work |
| SPP | DBD | 8 | 56.6 | 71.1 | 40.2 | This work |
| MFM-300(Fe) | DBD | 2 | ＜3 | 96  (C2H4+C2H2) | 1.2  (C2+) | 1 |
| WMO/m-SiO2 | DBD | 17 | 39 | 42.3 (C2H4+C2H2) | 16.5  (C2H4+C2H2) | 2 |
| α-Al2O3 | DBD | 44.1 | 55 | 7 | 3.85 | 3 |
| Sea sand | DBD | 43 | 55 | 5 | 2.75 | 3 |
| KIT-6 | DBD | 39 | 20 | 14 | 2.80 | 3 |
| NaY | sliding arc | 6.5 | 40 | 4 | 1.6 | 4 |
| CuO/CeO2 | DBD | 15-16 | ~8 | 36.1 | ~2.9 | 5 |
| 14 wt%Pd/γ-Al2O3 | DBD | 2.8 | 32.5 | 6 | 1.95 | 6 |
| 8 wt%Pt/γ-Al2O3 | DBD | 14.2 | 12 | 11 | 1.3 | 7 |
| 5 wt%Pd/γ-Al2O3 | DBD | 7-8 | 52 | 2.1 | 1.09 | 8 |
| Fe@SiO2 | thermal | 1363 | 48.1 | 48.4 | 23.3 | 9 |
| Pt1Sn2/H-ZSM-5 | thermal | 973 | 0.5 | 80 | 0.4 | 10 |
| Pt/CeO2 | thermal | 1180 | 14.4 | 50 | 7.2 | 11 |

**References**

1. Ma, Y. et al. Direct Conversion of Methane to Ethylene and Acetylene over an Iron-Based Metal–Organic Framework. *J. Am. Chem. Soc.* **145**, 20792-20800 (2023).

2. Lu, C. et al. Shielded bifunctional nanoreactor enabled tandem catalysis for plasma methane coupling. *Nat. Commun.* **16**, 4585 (2025).

3. Kim, J. et al. Effects of dielectric particles on non-oxidative coupling of methane in a dielectric barrier discharge plasma reactor. *Chem. Eng. J.* **377**, 119896 (2019).

4. Liu, C.-j., Mallinson, R. & Lobban, L. Nonoxidative Methane Conversion to Acetylene over Zeolite in a Low Temperature Plasma. *J. Catal.* **179**, 326-334 (1998).

5. Liu, R. et al. Plasma-driven non-oxidative coupling of methane to ethylene and hydrogen at mild temperature over CuxO/CeO2 catalyst. *J. Catal.* **440**, 115810 (2024).

6. García-Moncada, N., van Rooij, G., Cents, T. & Lefferts, L. Catalyst-assisted DBD plasma for coupling of methane: Minimizing carbon-deposits by structured reactors. *Catal. Today* **369**, 210-220 (2021).

7. Jo, S., Kim, T., Lee, D.H., Kang, W.S. & Song, Y.-H. Effect of the Electric Conductivity of a Catalyst on Methane Activation in a Dielectric Barrier Discharge Reactor. *Plasma Chem. Plasma Process.* **34**, 175-186 (2013).

8. Taheraslani, M. & Gardeniers, H. Plasma Catalytic Conversion of CH4 to Alkanes, Olefins and H2 in a Packed Bed DBD Reactor. *Processes* **8**, 774 (2020).

9. Guo, X. et al. Direct, Nonoxidative Conversion of Methane to Ethylene, Aromatics, and Hydrogen. *Science* **344**, 42-45 (2014).

10. Gerceker, D. et al. Methane Conversion to Ethylene and Aromatics on PtSn Catalysts. *ACS Catal.* **7**, 2088-2100 (2017).

11. Zhang, H. et al. Pt/CeO2 as Catalyst for Nonoxidative Coupling of Methane: Oxidative Regeneration. *J. Phys. Chem. Lett.* **14**, 6778-6783 (2023)
